1 **Population genomic evidence that human and animal infections in Africa come from the same**  
2 **populations of *Dracunculus medinensis***

3 Caroline Durrant<sup>1</sup>, Elizabeth A. Thiele<sup>2</sup>, Nancy Holroyd<sup>1</sup>, Stephen R Doyle<sup>1</sup>, Guillaume Sallé<sup>1,3</sup>, Alan  
4 Tracey<sup>1</sup>, Geetha Sankaranarayanan<sup>1</sup>, Magda E. Lotkowska<sup>1</sup>, Hayley M. Bennett<sup>1,9</sup>, Thomas Huckvale<sup>1</sup>,  
5 Zahra Abdellah<sup>1</sup>, Ouakou Tchindebet<sup>4</sup>, Mesfin Wossen<sup>4</sup>, Makoy Samuel Yibi Logora<sup>4</sup>, Cheick Oumar  
6 Coulibaly<sup>4</sup>, Adam Weiss<sup>4</sup>, Albrecht I Schulte-Hostedde<sup>5</sup>, Jeremy Foster<sup>6</sup>, Christopher A. Cleveland<sup>7</sup>,  
7 Michael J. Yabsley<sup>7</sup>, Ernesto Ruiz-Tiben<sup>4</sup>, Matthew Berriman<sup>1†</sup>, Mark L. Eberhard<sup>8</sup>, James A. Cotton<sup>1†</sup>

8 †Authors for correspondence: James Cotton: [james.cotton@sanger.ac.uk](mailto:james.cotton@sanger.ac.uk). Matthew Berriman:  
9 [mb4@sanger.ac.uk](mailto:mb4@sanger.ac.uk) . Both: Wellcome Sanger Institute, Wellcome Genome Campus, Hinxton,  
10 Cambridgeshire, United Kingdom. CB10 1SA

11

12 1. Wellcome Sanger Institute, Hinxton, Cambridgeshire, United Kingdom

13 2. Department of Biology, Vassar College, Poughkeepsie, New York, USA

14 3. INRA - U. Tours, UMR 1282 ISP Infectiologie et Santé Publique, Nouzilly, France

15 4. The Carter Center, Atlanta, Georgia, USA

16 5. Department of Biology, Laurentian University, Sudbury, Canada

17 6. New England Biolabs, Ipswich, Massachusetts, USA

18 7. University of Georgia, Athens, Georgia, USA

19 8. Centers for Disease Control and Prevention, Atlanta, Georgia, USA

20

21 9. Present Address: Berkeley Lights Inc., Emeryville, California, USA

22

23

24 **Abstract**

25 **Background:** Guinea worm – *Dracunculus medinensis* – was historically one of the major parasites of  
26 humans and has been known since antiquity. Now, Guinea worm is on the brink of eradication, as  
27 efforts to interrupt transmission have reduced the annual burden of disease from millions of  
28 infections per year in the 1980s to only 30 human cases reported globally last year. Despite the  
29 enormous success of eradication efforts to date, one complication has arisen. Over the last few  
30 years, hundreds of dogs have been found infected with this previously apparently anthroponotic  
31 parasite, almost all in Chad. Moreover, the relative numbers of infections in humans and dogs  
32 suggests that dogs may be key in maintaining transmission in that country.

33 **Results:** In an effort to shed light on this peculiar epidemiology of Guinea worm in Chad, we have  
34 sequenced and compared the genomes of worms from dog, human and other animal infections.  
35 Confirming previous work with other molecular markers, we show that all of these worms are *D.*  
36 *medinensis*, and that the same population of worms are causing both infections, can confirm the  
37 suspected transmission between host species and detect signs of a population bottleneck due to the  
38 eradication efforts. The diversity of worms in Chad appears to exclude the possibility that there were  
39 no, or very few, worms present in the country during a 10-year absence of reported cases.

40 **Conclusions:** This work reinforces the importance of adequate surveillance of both human and dog  
41 populations in the Guinea worm eradication campaign and suggests that control programs should  
42 stay aware of the possible emergence of unusual epidemiology as they approach elimination.

43

44

## 45 **Background**

46 Guinea worm – *Dracunculus medinensis* (Linnaeus, 1758) Gallandant, 1773 – has been an important  
47 human parasite for most of history. It is also one of the best known human pathogens and has been  
48 known since antiquity (Muller, 1971). This infamy is presumably due to its distinctive life cycle,  
49 where the large adult female worm (up to 1m long) causes excruciating pain as it emerges from a  
50 skin lesion. As recently as 1986, there were probably over 3 million cases of Guinea worm disease  
51 (GWD) from 22 countries in Africa and Asia (Watts, 1987) and historically probably very many more  
52 (Stoll, 1947). Called the quintessential “forgotten disease of forgotten people,” GWD was  
53 responsible for an enormous disease burden as patients are incapacitated for several weeks during  
54 worm emergence (Weiss et al., 2018; and many other studies cited in Ruiz-Tiben & Hopkins, 2006),  
55 and subsequent complications and serious secondary infections of the resulting ulcer are common  
56 and occasionally fatal (Muller, 1971).

57 Following the eradication of smallpox in 1980, public health scientists at the US Centers for Disease  
58 Control and Prevention (CDC) recognised that Guinea worm disease was a potential target for  
59 eradication (e.g. Muller, 1979; Bourne, 1982). Since 1986, Guinea worm has been the target of a  
60 large-scale control program aiming for complete, global eradication of the disease and extinction of  
61 the parasite responsible (Cairncross, Muller, & Zagaria, 2002). The introduction of interventions to  
62 encourage residents to report cases of GWD, prevent infected persons from contaminating source of  
63 drinking water, provide new sources of safe water and promote greater use of existing sources,  
64 promote the use of cloth and pipe (“straw”) filters, and the application of vector control measures  
65 has subsequently reduced the incidence of GWD (Hopkins & Ruiz-Tiben, 1991; Ruiz-Tiben & Hopkins,  
66 2006). As the program has progressed, these measures have been complemented by work to ensure  
67 sources of infection are traced and treated for cases, containment of cases to prevent contamination  
68 of water, and active searching for new cases (Hopkins & Ruiz-Tiben, 1991). The Guinea worm  
69 eradication program has been a great success – by 2000 there were only 74,258 cases of GWD in 15  
70 countries in sub-Saharan Africa (Centers for Disease Control and Prevention, 2001), and this had  
71 fallen to just 15 cases in each of Chad and Ethiopia as of 2017 (Hopkins et al., 2018). Either Guinea  
72 worm disease or polio (Grassly & Orenstein, 2018) will soon become the second human disease to  
73 be eradicated, and Guinea worm is on track to be the first to be wiped out without a vaccine, and  
74 probably the first animal species to be deliberately made extinct.

75 The eradication campaign was predicated on *D. medinensis* being an anthroponotic parasite, with  
76 transmission between people via drinking water. Sporadic reports of animal infections were  
77 assumed to either be due to misidentification of the worm involved or to represent spill-over

78 infection of little or no epidemiological importance. However, experimental infections of non-human  
79 animals – and particularly of dogs – have been performed successfully on a number of occasions  
80 (Muller, 1971). In natural conditions, worms have particularly frequently been reported as emerging  
81 from dogs, but generally at a low prevalence and sporadically. When human infections with Guinea  
82 worm have been eliminated from a region, dog infections from that region have subsequently  
83 disappeared (Eberhard, Ruiz-Tiben, & Hopkins, 2016; Eberhard et al., 2014). There are some  
84 apparent exceptions: for example, in Bukhara, Uzbekistan, where a hotspot of very high Guinea  
85 worm prevalence (up to 20%) was eliminated in the 1930s, Guinea worm infections in dogs  
86 continued to be reported, but no human cases were found after 1931 (World Health Organisation,  
87 1998; Litvinov & Lysenko, 1985).

88 From 2012, however, a distinct, and apparently unique situation became evident in Chad, where  
89 large numbers of infections in domestic dogs have appeared, against the background of a small  
90 number of human cases (Eberhard et al., 2014). Dog infections became evident beginning in April  
91 2012, when the Chad Guinea worm eradication program (with assistance from The Carter Center)  
92 launched active village-based surveillance in nearly 700 villages, following the detection in 2010 of  
93 human cases for the first time in 10 years in Chad. With increasing surveillance of dog populations,  
94 the number of dog infections reported has subsequently steadily increased, and in 2016, there were  
95 over 1,000 infected dogs reported from Chad. Small numbers of dog infections have also been  
96 identified in the other recently endemic countries (in 2016, 14 from Ethiopia, 11 from Mali and none  
97 from South Sudan, although this country did report a single dog infection in 2015). Greater scrutiny  
98 of animals for potential Guinea worm infection has also revealed occasional infections in wildlife,  
99 such as cats and baboons (see Hopkins, Ruiz-Tiben, Eberhard, Roy, & Weiss, 2017 for a full  
100 description of the situation in 2016-2017).

101 In this context, there was some uncertainty as to whether the worms emerging from dog and human  
102 infections in Chad represented the same species. Most of the key defining morphological features  
103 for this group of nematodes are found on adult males, which are not recovered from natural  
104 infections (Muller, 1971; Cleveland et al., 2018). The other described species of the genus  
105 *Dracunculus* are all from the New World and include *D. insignis* and *D. lutrae* from North American  
106 carnivorous mammals and *D. fuelleborni* from a Brazilian opossum (Jones & Mulder, 2007; Muller,  
107 1971; Travassos, 1934). There are also numerous reports of *Dracunculus* spp. in reptiles  
108 – particularly snakes (see Cleveland et al., 2018). Molecular phylogenetic work supports the  
109 mammalian parasites as a distinct clade to those found in other vertebrates (Wijova, Moravec,  
110 Horak, Modry, & Lukes, 2005; Bimi, Freeman, Eberhard, Ruiz-Tiben, & Pieniazek, 2005; Elsasser,

111 Floyd, Hebert, & Schulte-Hostedde, 2009; Nadler et al., 2007). The diversity and phylogeny of the  
112 genus has recently been reviewed (Cleveland et al., 2018). There is a relative scarcity of  
113 parasitological work on wild mammals, and particularly of work looking beyond gastrointestinal  
114 species. There are also a number of reports of cryptic species of parasitic worms in wildlife  
115 (reviewed in Cole & Viney, 2018). It is thus possible that other, undescribed mammal-infective  
116 species exist, and these could explain the few reports of human or mammal Guinea worm infections  
117 from countries otherwise considered non-endemic (see Muller, 1971 for references to case reports).  
118 A number of comprehensive reviews of *D. medinensis* biology, epidemiology and control are  
119 available (Muller, 1971; e.g. Cairncross et al., 2002) and the reader is referred to the extensive  
120 literature on the Guinea worm eradication program (Hopkins & Ruiz-Tiben, 1991; Ruiz-Tiben &  
121 Hopkins, 2006; Biswas, Sankara, Agua-Agum, & Maiga, 2013; e.g. Al-Awadi et al., 2014; Molyneux &  
122 Sankara, 2017), including regularly updated surveillance data (most recently in Hopkins et al., 2018).

123 Previous molecular work established that *D. medinensis* and *D. insignis* could be differentiated at the  
124 *18S rRNA* locus, and that a single dog worm from Ghana was identical at that locus to *D. medinensis*  
125 collected from nearby human cases (Bimi et al., 2005). We subsequently reported data from the *18S*  
126 *rRNA* locus and a mitochondrial marker for 14 worms that emerged from humans and 17 from dogs  
127 in Chad, together with whole-genome data from 6 worms (Eberhard et al., 2014). A draft reference  
128 genome assembly based on sequence data from a single worm from Ghana (International Helminth  
129 Genomes Consortium, 2017) recently gave the first picture of the genome content of this species  
130 and confirmed the phylogenetic position of *D. medinensis* within a large spiruromorph clade of  
131 parasites related to filarial nematodes. Here, we present an improved genome assembly for *D.*  
132 *medinensis* and whole genome sequence data for a much larger set of adult *D. medinensis* and from  
133 two closely related species. Together, these data give a detailed picture of the relationships between  
134 *D. medinensis* from different hosts and countries, and confirms existing microsatellite genotyping  
135 and mitochondrial sequence data from the same populations (Thiele et al., 2018) which showed that  
136 human cases of dracunculiasis and animal infections all originate from the same populations of *D.*  
137 *medinensis*.

138

139

## 140 **Results**

### 141 **Whole-genome sequence data from *Dracunculus* specimens from a range of host species and** 142 **geographic regions**

143 In this study, we attempted to generate whole-genome shotgun sequence data for 90 *D. medinensis*  
144 specimens; for four samples we could not make sequencing libraries. We also sequenced two  
145 samples of *D. insignis* and one sample of *D. lutrae*. To aid interpretation of these data, we used the  
146 original Illumina data used to improve the v2.0.4 reference genome assembly for *D. medinensis* –  
147 based on a worm collected in Ghana in 2001 (International Helminth Genomes Consortium, 2017) –  
148 with a combination of both manual and automated approaches to produce an improved (v3.0)  
149 assembly for *D. medinensis*. This substantially improved contiguity and reduced misassemblies, for  
150 example the average scaffold length is twice that of the previously published assembly version  
151 (Supplementary table 1).

152 Despite extensive sequencing effort, mapping our data against this reference showed that we  
153 achieved a median depth of 10x coverage for only about one-third (33) of *D. medinensis* samples.  
154 Unless otherwise specified, subsequent analyses were restricted to this set of 33 *D. medinensis*  
155 samples. These samples were collected from a number of African countries (Figure 1), with 22 from  
156 Chad, 5 from Ethiopia, 2 each from Ghana and South Sudan and 1 each from Mali and Côte d'Ivoire.  
157 It included 15 samples from humans, 15 from dogs and 3 from other animals (2 Ethiopian baboons,  
158 *Papio anubis*, and one from a Chad cat, *Felis catus*). Full details of the samples and coverage  
159 achieved are shown in Table 1. The low coverage we achieved was due to extensive contamination  
160 with bacterial and, in some cases, host DNA, so that the percentage of reads mapping to the  
161 reference varied from 0.07% up to 94.8% (see Figure 1; Supplementary Figure 1); even within the  
162 genome-wide coverage set of 33 samples as few as 17.9% of reads mapped in one case. For 9 *D.*  
163 *medinensis* samples, sequence libraries were generated from both adult female material and L1  
164 larvae present in the same sample tubes (representing the offspring of that female).

165 Coverage also varied across the genome, most strikingly for two of the longest 5 scaffolds, which  
166 were often lower in coverage than other large scaffolds, varying from around three-quarters of the  
167 expected coverage to approximately similar coverage. We hypothesised that these scaffolds could  
168 represent all or part of a sex chromosome (X) in *D. medinensis*. The L1 larval samples showed  
169 coverage on these scaffolds around 75% that for other large scaffolds, as expected for an XY or XO  
170 sex determination system if the pool of larvae consisted of an approximately equal ratio of male and

171 female larvae. More surprisingly, most of the DNA samples extracted from female worms showed  
172 similarly low relative coverage of these two scaffolds. We suggest that this is because much of the  
173 material extracted from these specimens is actually from L1 larvae remaining in the body of the  
174 female worm section. This seems plausible, as much of the female body comprises uterus containing  
175 several million larvae (Cairncross et al., 2002), and if the female body was largely degraded that  
176 explains the difficulty we had in extracting DNA from many samples.

177 To confirm this, we generated sequence data for juvenile worms harvested from a domestic ferret  
178 experimentally infected with *D. medinensis* (Eberhard, Yabsley, et al., 2016). These worms were 83  
179 days old and pre-patent (and thus comprised only or largely somatic tissue), but could be  
180 morphologically identified as male and female. Analysis of data from these worms (Figure 2a)  
181 confirmed that the scaffolds with low coverage showed this pattern specifically in male worms,  
182 while the female worm showed essentially even coverage across the largest scaffolds, including the  
183 putative X and likely autosomal scaffolds. Further evidence comes from a comparison with  
184 *Onchocerca volvulus*, in which the sex chromosomes are known, as there is clear synteny between  
185 the *D. medinensis* scaffolds with variable coverage and one end of the *O. volvulus* X chromosome  
186 (Supplementary Figure 2). This part of the *O. volvulus* X chromosome represents the ancestral X  
187 chromosome of filarial nematode (Cotton et al., 2016): these data suggest that this was already  
188 present in *Dracunculus*, as well as filarial nematodes as previously suggested (Post, 2005).

189 We thus used the ratio of mean coverage between the 3 largest autosomal scaffolds and 2 longest X  
190 chromosome scaffolds as a measure of the proportion of genomic DNA in our sample derived from  
191 larval vs female tissue, under the assumption that larvae are an equal mixture of the two sexes  
192 (Figure 2b). These data confirm that many samples contain substantial amounts of larval-derived  
193 DNA. One sample had a particularly high value for this statistic – for this sample, the mean coverage  
194 on scaffold X\_DME\_002 was inflated by the presence of a small region of extremely high read depth.  
195 X chromosome scaffolds were also excluded from subsequent population genetic analyses likely to  
196 be sensitive to the different dosage of these chromosomes (see Methods).

197

### 198 **African *D. medinensis* is highly divergent from other mammalian *Dracunculus* species**

199 While most sequencing reads from high-quality *D. medinensis* samples mapped against our  
200 reference assembly (median across samples of 68.48%), the reads from the other two *Dracunculus*  
201 species mapped less comprehensively against the *D. medinensis* reference (Supplementary Table 1),  
202 which given the mapping parameters used suggests that many regions of the genome are more than

203 5% divergent between species. This was confirmed by variant calls in those regions of good read  
204 mapping: even given the poorer mapping quality, around 2.9 million sites varied between the three  
205 species, suggesting genome-wide divergence of at least 3% of the 103.8 Mb genome, as the mapping  
206 difficulty meant this is likely a significant underestimate. While interpretation of absolute divergence  
207 levels is difficult, our lower-bound estimate of divergence between these species is much greater  
208 than between different species of *Onchocerca* (*O. ochengi* and *O. volvulus*, respectively), which are  
209 less than 1% divergent (Cotton et al., 2016) and is consistent with having hundreds of thousands of  
210 years of independent evolutionary history. A principal components analysis (PCA) of SNP variants  
211 between these samples confirmed that samples from each species cluster closely together, and that  
212 the different species are well separated (Figure 3a). The first two principal component axes shown  
213 here explain 79.9% and 16.5% of the variation, respectively. More than 3-fold more sites were called  
214 as varying between *Dracunculus* spp. than observed across all 33 of our genome-wide *D. medinensis*  
215 samples, where about 981,198 sites vary.

#### 216 **Geography rather than host species explains the pattern of variation within African *D. medinensis***

217 Clear geographic structure was observed in the pattern of genome-wide variation within *D.*  
218 *medinensis*. PCA (Figure 3b) of the variants show distinct clusters of parasites from Ghana, Mali and  
219 Côte d'Ivoire (referred to as the 'West African' cluster) the Ethiopia, South Sudan and one Chad  
220 sample (an 'East African' cluster), and a group of parasites from Chad. The first two principal  
221 components explain only 22% of the variation in these data (14% and 8% respectively). Additional  
222 principal components axes, up to the 8<sup>th</sup> axis, together explain 54% of the variation but none of  
223 these axes partition the genetic variation between host species (Supplementary Figure 3).

224 Phylogenetic analysis (Figure 3c) supported this pattern, with clear clades of West African and East  
225 African worms. The Chad sample visible as being part of the East African cluster in the PCA (2015-  
226 5ChD, a worm from a dog infection emerging in 2015) was part of the East African clade in the  
227 phylogenetic tree. A second Chad worm, from a human case in 2011, also appeared to be divergent  
228 from any other worm on our phylogeny. There was no apparent clustering by host species in Chad or  
229 Ethiopia, the two countries for which worms from multiple dog and human infections were included,  
230 and no clear clustering by year of worm emergence. In all three cases where both L1 larvae and  
231 adult sections from a single emerging worm yielded high-quality data, these two samples clustered  
232 very closely together.

233 Other approaches to investigate population structure support these conclusions. Bayesian clustering  
234 using Maverick strongly supported a model of only 2 populations ( $K=2$ ) for these data, with posterior



235 probability of 1.0 for this value of  $K$ . The two populations divided worms collected in Chad from  
236 those collected elsewhere, with the exception of the Chad worm 2015-5ChD, which clustered with  
237 those from other countries, as in the PCA and phylogeny. Analysis with Structure suggested that  $K$   
238 values of between 2 and 4 fitted the data well. In all cases these analyses clustered worms largely by  
239 geographical origin, and not by host. In the highest  $K$  values, most Chad worms had mixed ancestry  
240 between two Chad populations, and in no analysis did worms from different host species cluster  
241 together more than expected (Supplementary Figure 4). As expected, differences in allele  
242 frequencies between worms from dog infections and human cases within Chad are low (mean  $F_{st}$   
243 0.01806, 99% confidence interval 0.0172-0.0189; median  $F_{st}$  0.0114, CI 0.0109-0.0118) and  
244 consistently low across the genome (Supplementary Figure 5), confirming that there is no genetic  
245 difference between worms infecting dogs and humans.

#### 246 **Mitochondrial genome data confirms the geographic structure of the *D. medinensis* population**

247 To allow us to study a wider range of samples, we called variants against the mitochondrial genome  
248 of *D. medinensis* for a total of 65 samples that had median coverage of at least 10x across this  
249 sequence. The additional samples included 14 dog and 18 human samples and included a single  
250 sample from Niger, slightly expanding the geographical range of samples included. Our variant  
251 calling approach identified 182 variable sites that could be reliably genotyped across those samples.  
252 The results of this analysis (Figure 4) are congruent with those from nuclear genome variation, with  
253 a strong signal of clustering by geographical origin. The worm collected in Niger joined a tight cluster  
254 that included all West African samples (Ghana, Mali and Côte d'Ivoire) with the exception of two  
255 worms from Mali collected in 2014: one was closely related to two worms from Chad cases in 2014  
256 and 2015, and the second appears as an outgroup to a large clade of Chad worms. The two other  
257 exceptions to the clear geographical structure were a worm from a dog in Chad in 2015 which was  
258 most similar to one from a South Sudan case from 2014 within a small clade of Ethiopia and South  
259 Sudan worms, and one from a human case in Chad in 2014 that groups as part of a more diverse  
260 group of Ethiopia worms. As with the nuclear data, worms from human cases and infections in dogs  
261 and other animals often group together, with extremely similar mitochondrial haplotypes; there is  
262 no clear signature of clustering by host species.

#### 263 ***D. medinensis* from Chad are genetically diverse but are in decline**

264 Phylogenetic analysis of both nuclear and mitochondrial data, and the nuclear genome PCA appear  
265 to show that worms in Chad are considerably more diverse than those from the other regions  
266 included in our analysis. To ensure an adequate sample size for comparison, we combined samples

267 from countries with small numbers of samples into three regional groups, combining Ethiopia and  
268 South Sudan samples into an East African group, and samples from Mali, Ghana and Côte d'Ivoire  
269 into a West African group, while Chad was considered alone. Population genetic summary statistics  
270 (Supplementary Table 3) for these groups confirmed the pattern suggested by phylogenies and PCA:  
271 we see highest nucleotide diversity ( $\Pi$ ) in Chad, while the East African group is slightly, but  
272 significantly less diverse and the West Africa group has an order-of-magnitude lower nucleotide  
273 diversity. A second estimator of genetic diversity (Watterson's  $\Theta$ ) shows lower values for the East  
274 African and Chad populations, but is higher in East Africa than Chad. For neutral variants in a  
275 population at equilibrium  $\Pi$  and  $\Theta$  are expected to be equal, but Watterson's estimator is heavily  
276 influenced by rare alleles. The difference between  $\Pi$  and  $\Theta$  that we observe indicates an excess of  
277 common variants in the East Africa and Chad populations over neutral expectations (see e.g.  
278 Charlesworth & Charlesworth, 2010 pp28-30 and pp288-289 for a full description). This is captured  
279 by high Tajima's D values, which are simply a normalised difference between  $\Pi$  and  $\Theta$ . While a  
280 variety of population genetic processes can influence these statistics, high Tajima's D across the  
281 genome in these two regions is most likely indicative of a demographic process, such as a recent  
282 sharp decline in the worm populations (Tajima, 1989).

283

#### 284 **Coalescent models suggest a large population has been continuously present in Chad**

285 To confirm the population structure of *D. medinensis* in Africa, we constructed coalescent models  
286 based on 1kb loci spaced every 100kb – much longer than the distance over which linkage  
287 disequilibrium decays to approximately background levels – across the large scaffolds of the *D.*  
288 *medinensis* reference genome assembly. Due to our small number of samples, we combined  
289 samples into three regional groups. Ethiopia and South Sudan samples were combined into an East  
290 African group, samples from Mali, Ghana and Côte d'Ivoire into a West African group; and samples  
291 from Chad comprised their own group. Our more extensive sample of worms from Chad meant we  
292 could investigate whether Chad worms were best explained as two host-specific populations of  
293 worms from dog infections and human cases, or as a single group. Only two scenarios for the  
294 population structure received support in the posterior sample from the Markov chain Monte Carlo  
295 (MCMC) procedure (see Figure 5a). In both scenarios, worms from Chad were more closely related  
296 to those from the East African group than to the West African group. By far the strongest support  
297 (average 97.9% of posterior samples, over 3 replicate sets of 100 random loci) supported a single  
298 Chad population of worms that emerged from both human and dog hosts.

299 Using this highly supported population history, we used a second coalescence approach to estimate  
300 parameters describing the demographic history of the three regional present-day populations and  
301 the ancestral populations that gave rise to them (Figure 5b). Assuming a similar per-generation  
302 mutation rate to *C. elegans* and a generation time of 1 year, these analyses suggest that the Chad  
303 and East African populations have been separated for at least several thousand years, and that  
304 divergence from the West African population was about 5-fold older. The long-term effective  
305 population sizes of the Chad and East Africa populations reflect the higher nucleotide and  
306 phylogenetic diversity, with Chad being around 4-fold higher with an estimated 20 to 40 thousand  
307 breeding individuals.

### 308 **Relatedness between *D. medinensis* isolates**

309 Our population genetic evidence supports the idea that a single, diverse population of Guinea  
310 worms exists in Chad and is infecting both humans and animal species. More direct evidence of  
311 transmission between host species would be genetic relatedness between worms that emerged in  
312 different species. We employed a method to estimate pairwise relatedness between isolates based  
313 on SNP variants that is intended to be robust to population structure. Kinship is the probability that  
314 a random allele sampled from each of two individuals at a particular locus are identical by descent.  
315 The expected value in an outbred diploid population is 0.5 for monozygotic twins and 0.25 for full  
316 sibs or parent-offspring pairs.

317 The median kinship across all pairs of samples we find is low, but non-zero (0.0078; approximately  
318 that expected for third cousins), but worms from the same countries are much more highly related  
319 (e.g. average kinship of 0.0846 for pairs within Chad). There is clear geographic structure to kinship  
320 in these data, as most worm samples from the same countries are related to at least one other  
321 sample from that country with kinship of close to 0.25 or higher (Figure 6), while only a single pair of  
322 closely related worms are from different countries. Notably, six pairs of worms have relatedness of  
323 higher than 0.45, close to the maximum possible value of 0.5 (Figure 6). These six pairs include all 3  
324 sets of matched adult and larval samples in the whole-genome coverage set, providing support for  
325 the hypothesis that other pairs with a similarly high relatedness could represent either parent-  
326 offspring or full sibling pairs. The inflated kinship values is explained by a high level of inbreeding  
327 within each country. The other three pairs of high-relatedness samples are all from different worms  
328 and from consecutive years, so we interpret these as being parent-offspring pairs and these links  
329 thus represent putative direct transmission events between guinea worm infections.

330 The three pairs we identify are all of significant epidemiological interest. One appears to confirm  
331 cross-border transmission, proposing that a worm emerging from a dog in Chad in 2015 was caused  
332 by a human case detected in South Sudan in 2014. A second pair links a human case in 2014 in Chad  
333 with a dog infection in 2015, apparently confirming transmission is possible between human cases  
334 and dog infections, while a third links two Chad dog infections in 2014 and 2015. One important  
335 note of caution is that all three of these events would imply long range transmission of the infection,  
336 with 1812km, 378km and 432km separating the three pairs of infections above, respectively; the  
337 two transmission events within Chad also imply movement in different directions on the Chari river  
338 basin (Figure 7).

339

340

341 **Discussion**

342 Our data shows that a single population of *D. medinensis* is responsible for both dog infections and  
343 human cases in Chad, with genetic structure in *D. medinensis* being apparently driven by geographic  
344 separation rather than definitive host species. Our data suggest that all Guinea worm infections in in  
345 African mammals are caused by a single species, *D. medinensis*. The two other species of  
346 *Dracunculus* with mammalian hosts for which we have sequence data are highly divergent from any  
347 *D. medinensis* specimen we investigated. Genetic variation does exist within *D. medinensis* in Africa,  
348 but follows a spatial pattern, with populations from South Sudan and Ethiopia being more closely  
349 related to worms from Chad, and more divergent population of *D. medinensis* being present in West  
350 African countries prior to the recent elimination of the parasite from that region. The set of samples  
351 we have investigated from Chad and East Africa show a particularly high genetic diversity, but also  
352 strong signals of a recent population bottleneck, presumably driven by the ongoing work to  
353 eradicate Guinea worm in those areas.

354 We have identified three pairs of worms with high kinship that emerged in consecutive years, which  
355 we propose may represent transmission events. If so, our data confirm that cross-border  
356 transmission of Guinea worm infection can occur (from South Sudan to Chad in this case) and that  
357 infections can be passed from dog to dog and from humans to dogs. Unfortunately, we did not  
358 observe dog to human transmission directly in these data, although this is likely to be due to the  
359 small number of transmission events we could reconstruct, rather than because these transmissions  
360 are rare. Interpreting kinship in an inbred population is difficult, so these genealogical links must be  
361 considered only provisional, although we note that all three pairs of larval-adult samples for which  
362 we had good sequence coverage were correctly identified by this approach. While our data do not  
363 speak directly to the changes in lifecycle that might be driving transmission through dog hosts in  
364 Chad, both the long-range nature of these 3 transmission events and the fact that they imply  
365 different directions of movement along the Chari river basin would seem to lend some support to  
366 the idea that a paratenic or transport host could be involved. In particular, as one event is between  
367 two dog hosts, human movement may be less likely to be involved. It has been demonstrated  
368 experimentally that *D. medinensis* can pass through tadpoles as paratenic hosts and fish as transport  
369 hosts and that both routes can successfully infect ferrets (Cleveland et al., 2017; Eberhard, Yabsley,  
370 et al., 2016). Furthermore, a frog naturally infected with *D. medinensis* has been found in Chad  
371 (Eberhard, Cleveland, et al., 2016). Wildlife infections are also being reported, for example with a  
372 number of infections recently reported in Baboons in Ethiopia (Hopkins et al., 2018).

373 Our coalescent models of the Guinea worm population genetic data appear to confirm the  
374 geographical structure of these populations, and that worms from human cases and dog infections  
375 in Chad form a single population. The estimates of population divergence dates imply that the  
376 genetic structure we observe between different regions of Africa predates recent control efforts and  
377 likely represents historical population structure. The oldest subdivision we observe, at around  
378 20,000 years ago, coincides with the last glacial maximum when Africa was likely to be extremely  
379 arid, even compared to present-day conditions (Hoag & Svenning, 2017). Similarly the more recent  
380 divergence between East African and Chad populations at around 4,000 years ago is during the  
381 drying-out of the Sahara at the end of the African humid period (Hoag & Svenning, 2017), which was  
382 probably accompanied by a major collapse in human habitation of much of this region (Manning &  
383 Timpson, 2014). Although our qualitative results appear robust, there are more caveats with the  
384 specific quantitative results. In particular, these estimates depend on assumptions about the  
385 mutation rate and generation time of *D. medinensis*. It is generally accepted that Guinea worm  
386 infections take approximately 10-14 months to reach patency in human infections (Cairncross et al.,  
387 2002; Muller, 1971). Less certain is whether larvae can remain viable in copepods or within a  
388 paratenic host for extended periods of time. No direct measurement of the mutation rate is  
389 available for *D. medinensis* or any related parasitic nematode, and while mutation rates are  
390 reasonably consistent across eukaryotes with similar genome sizes (Lynch, 2010), variation of several  
391 fold from the value we have assumed would not be very surprising. We also note that the relative  
392 values of divergence time and population size estimates will remain unchanged under different  
393 mutation rates.

394 Our quantitative model suggests that all three present-day populations have large average effective  
395 population size ( $N_e$ ) (of the order of thousands to low tens of thousands) over thousands of years.  
396 The modelling approach we have used is not able to detect more recent changes in these  
397 populations, and interpreting these estimates is challenging, as genetic effective population sizes are  
398 influenced by many factors such as breeding systems, demography and selection. In particular,  
399 historical fluctuations in population size have a strong influence on  $N_e$ , approximated by the  
400 geometric mean of the population sizes across generations (Charlesworth & Charlesworth, 2010  
401 pp225-226). The high  $N_e$  in Chad appears to exclude the possibility that the population of worms in  
402 Chad either disappeared or was reduced to a very small bottleneck during the decade without  
403 reported human cases; it is difficult to reconcile with a population size during this time much below  
404 hundreds of worms. In the absence of Chad samples prior to 2000, or more extensive sampling from  
405 neighbouring countries we cannot exclude the possibility that the Chad worms we analyse – which  
406 all emerged in Chad following the 10-year gap in reported cases – migrated from elsewhere.

407 However, we see few Chad worms that are closely related to worms from any of the neighbouring  
408 countries for which we had access to samples, so this possibility is purely speculation, and it would  
409 seem that quite large-scale influx would be required to explain the level of diversity we see in Chad  
410 by migration. Without historical samples, it also remains uncertain to what extent the population  
411 structure we see in African Guinea worm today would have been different 30 years ago, when the  
412 census population size of the worms was more than three orders of magnitude higher and worms  
413 were still widespread in Africa. Our coalescence model suggests that at least Chad and the East  
414 African populations we have sampled were still largely distinct at this time, but we have not been  
415 able to obtain worm samples suitable for molecular analysis from much of the ancestral range of *D.*  
416 *medinensis*.

417 A limitation is the nature of samples available to us, and in particular the very small quantity of  
418 genuinely adult material present in specimens despite these being very large for a parasitic  
419 nematode. Enrichment methods targeting parasite over host DNA cannot enrich for adult versus  
420 larval DNA and it is operationally difficult to alter the way that material is collected in the field in the  
421 context of the eradication campaign. The nature of our existing samples as mixtures of many diploid  
422 individuals makes some forms of analysis challenging: for example, many of the most sensitive  
423 signatures of inbreeding we expect to see appearing as the population size declines rely on changes  
424 in the level and distribution of homozygous and heterozygous sites (Diez-Del-Molino, Sanchez-  
425 Barreiro, Barnes, Gilbert, & Dalen, 2018). These are not readily apparent in analysis of the data  
426 presented here, presumably because of the mixture of genotypes present in each sample. These  
427 may be particularly complex if, like many other parasitic nematodes *D. medinensis* is polyandrous  
428 (Redman et al., 2008; Zhou, Yuan, Tang, Hu, & Peng, 2011; Doyle et al., 2018). We are currently  
429 generating sequence data from individual L1 larvae which should let us look for these signals, dissect  
430 the contribution of different males to a brood, and infer recombination and mutation rates in *D.*  
431 *medinensis*, avoiding the need to rely on estimates from *C. elegans*, which is both very distantly  
432 related to *D. medinensis* and has, of course, a very different life history. We have recently  
433 demonstrated the feasibility of this approach in a different parasitic nematode system (Doyle et al.,  
434 2018). Efforts to extract useful genome-wide information from the low-quality *D. medinensis*  
435 samples not analysed here are ongoing, with results from a sequence capture approach showing  
436 some promise. Our results are consistent with the findings of previously published targeted  
437 genotyping with mitochondrial and microsatellite markers, which also produced additional insights  
438 into the population genetics of *D. medinensis* from a much more extensive set of parasite samples  
439 (Thiele et al., 2018).

440 Finally, the data we present here, together with other data from Guinea worm populations (Bimi et  
441 al., 2005; Eberhard et al., 2014; Thiele et al., 2018) preserve something of the genetics of *D.*  
442 *medinensis* in the final foci of infection. The genome sequence should help preserve some of the  
443 biology of this important human pathogen following the extinction of *D. medinensis* with  
444 eradication, but more importantly we expect these data to be crucial in the final steps aftermath of  
445 the eradication process. By defining much of the currently existing diversity of Guinea worm, these  
446 data will act as a reference to determine whether future cases for which the source of infection is  
447 unclear represent continuing transmission from these foci or previously unidentified worm  
448 populations. The emergence of large numbers of dog infections in Chad could not have been  
449 predicted, and the eradication campaign could uncover other unexpected aspects of Guinea worm  
450 biology or epidemiology. For example, a recent surprise is the emergence of Guinea worm infections  
451 in Angola, which has no previous history of Guinea worm disease (Centers for Disease Control and  
452 Prevention, 2018). It is likely that reports of emerging worms will appear post-eradication (Mbong  
453 et al., 2015): given the paucity of morphological features defining *D. medinensis*, molecular tools will  
454 be key in providing certainty about the pathogen involved, and thus ultimately in allowing the WHO  
455 to declare that the world is free of Guinea worm.

456 Our work has clear implications for other parasite systems as we move into an era intended to see  
457 enhanced control efforts, regional elimination and even eradication for several neglected tropical  
458 disease parasites (World Health Organisation, 2012). The Guinea worm eradication program has in  
459 many ways set the scene for these efforts in other parasites. The small size of the remaining Guinea  
460 worm populations means it should be particularly feasible to employ whole-genome approaches to  
461 track changes in Guinea worm populations during the final stages of eradication (Cotton, Berriman,  
462 Dalen, & Barnes, 2018), but the particular difficulties in generating high-quality sequence data and in  
463 interpreting these data for *D. medinensis* highlight the fact that every pathogen system is unique,  
464 and genetic surveillance will likely face unique challenges in each case. Whether the particular  
465 challenges of an apparently emerging zoonotic transmission cycle in the endgame of eradication are  
466 unique remains to be seen as programs for other pathogens advance. It seems clear that the  
467 endgame of elimination has different requirements to much of the process of reducing disease  
468 burden (Klepac, Metcalf, McLean, & Hampson, 2013) and the strong selection pressure on pathogen  
469 populations to evade control measures near eradication will result in evolutionary responses. The  
470 ecological changes apparently occurring in Guinea worm may be the equivalent of the evolution of  
471 drug resistance in chemotherapy-lead campaigns (Whitty, 2014).

472



473 **Conclusion**

474 Our results are entirely consistent with a single population of *D. medinensis* infecting both dogs and  
475 humans in Chad. We show genetic variation within *D. medinensis* is largely geographical, with  
476 significant differentiation between populations present in Chad, and those present in countries in  
477 East Africa (South Sudan and Ethiopia) and West Africa (Côte d'Ivoire, Ghana, Mali and Niger).  
478 Worms that were genetically very similar were recovered from human cases and animal infections in  
479 both Chad and Ethiopia. We find a particularly diverse population of worms in Chad and East Africa  
480 that appears to be shrinking, presumably due to the eradication program. Coalescent models  
481 confirm that a single population of worms infects both dogs and humans in Chad, and the long-term  
482 effective population size suggests that a significant Guinea worm population persisted in Chad  
483 during the ten-year period prior to 2010 during which no cases were reported. Kinship analysis  
484 shows that the Guinea worm population is highly inbred, as we might expect in a small and shrinking  
485 population, and suggests direct relatedness between 3 pairs of worms, including two recovered from  
486 human cases in one year and recovered from dogs in a subsequent season. In the context of  
487 epidemiological data and previous genetic data, this suggests that dog infections are likely to be  
488 central to maintaining Guinea worm transmission in Chad. Continued efforts to understand the  
489 biology of transmission in Chad, as well as sustained surveillance among both human and non-  
490 human hosts, will help ensure the continuing success of the eradication program.

491

## 492 **Methods**

493 Worm material from *D. medinensis* was collected by the national Guinea worm eradication programs  
494 in the relevant countries, except that material from experimentally infected ferrets were obtained as  
495 previously described (Eberhard, Yabsley, et al., 2016). *D. insignis* material was collected from an  
496 American mink (*Neovison vison*) and *D. lutrae* material was collected from an otter (*Lutra*  
497 *canadensis*) in Ontario, Canada (Elsasser et al., 2009).

498 Genomic DNA was extracted from either 5-15mm sections of adult female worm specimens or from  
499 the pool of L1 larvae visible in sample tubes, wherever larvae were visible. DNA extraction was  
500 performed using the Promega Wizard kit, but with worm specimens cut into small pieces before  
501 digestion with 200µg of Proteinase K overnight in 300 µl of lysis buffer, then following the protocol  
502 described in the manual. PCR-free 200 – 400 bp paired-end Illumina libraries were prepared from  
503 genomic DNA as previously described (Kozarewa et al., 2009) except that Agencourt AMPure XP  
504 beads were used for sample clean up and size selection. DNA was precipitated onto the beads after  
505 each enzymatic stage with a 20% (w/v) Polyethylene Glycol 6000 and 2.5 M sodium chloride  
506 solution, and beads were not separated from the sample throughout the process until after the  
507 adapter ligation stage. Fresh beads were then used for size selection. Where there was insufficient  
508 DNA for PCR-free libraries, adapter-ligated material was subjected to ~8-14 PCR cycles. Libraries  
509 were run on an Illumina platform (HiSeq 2000, 2500 or HiSeq X) to generate 100 base pair or 150  
510 base pair paired-end reads.

511 Sequence data was compared to a reference genome assembled from a worm collected in Ghana in  
512 2001. The sequence data and automated assembly of v2.0 of this reference is described fully  
513 elsewhere (International Helminth Genomes Consortium, 2017). The v3.0 reference used here has  
514 undergone some manual improvement, with REAPR (Hunt et al., 2013) used to identify problematic  
515 regions of the assembly to be broken, followed by iterative rounds of re-scaffolding as indicated by  
516 read-pair and coverage information visualised in GAP5 (Bonfield & Whitwham, 2010) and automated  
517 gap-filling with IMAGE (Tsai, Otto, & Berriman, 2010) and Gap-filler v1.11 (Nadalín, Vezzi, & Policriti,  
518 2012) and a final round of sequence correction with iCORN v2.0 (Otto, Sanders, Berriman, &  
519 Newbold, 2010). Assembly statistics for v2.0 and v3.0 of the *D. medinensis* genome are shown in  
520 Supplementary Table 1.

521 Mapping was performed with SMALT v.0.7.4 (<http://www.sanger.ac.uk/science/tools/smalt-0>),  
522 mapping reads with at least 95% identity to the reference, mapping paired reads independently and  
523 marking them as properly paired if the reads within a pair mapped in the correct relative orientation

524 and within 1000bp of each other (parameters  $-x -y 0.95 -r 1 -i 1000$ ). To avoid problems with  
525 mitochondrial data, mapping was also performed similarly against a reference containing  
526 mitochondrial genomes for dog, human and ferret. Duplicate reads were removed using Picard v2.6  
527 MarkDuplicates. The BAM files produced were used as input to Genome Analysis Toolkit v3.4.0 for  
528 variant calling, following the 'best practice' guidelines for that software release: briefly, reads were  
529 realigned around indel sites, after which SNP variants were called using HaplotypeCaller with ploidy  
530 2. Variants were then removed where they intersected with a mask file generated with the GEM  
531 library mappability tool (Derrien et al., 2012) with kmer length 100 and 5 mismatches allowed, or  
532 were within 100bp of any gap within scaffolds. Finally, SNPs were then filtered to keep those with  
533  $DP \geq 10$ ;  $DP \leq 1.75 * (\text{contig median read depth})$ ;  $FS \leq 13.0$  or missing;  $SOR \leq 3.0$  or missing,  
534  $ReadPosRankSum \leq 3.1$  AND  $ReadPosRankSum \geq -3.1$ ;  $BaseQRankSum \leq 3.1$  AND  $BaseQRankSum$   
535  $\geq -3.1$ ;  $MQRankSum \leq 3.1$  AND  $MQRankSum \geq -3.1$ ;  $ClippingRankSum \leq 3.1$  AND  
536  $ClippingRankSum \geq -3.1$ . An additional mask was applied, based on the all-sites base quality  
537 information output by GATK HaplotypeCaller. The filters applied were  $DP \geq 10$ ,  $DP \leq 1.75 * (\text{contig}$   
538  $\text{median read depth})$  and  $GQ \geq 10$ . Finally, sites with only reference or missing genotypes were then  
539 removed. Variant calling on the mitochondrion was performed similarly, except reads were first  
540 filtered to retain only those for which both reads in pair mapped uniquely to the mitochondrion in  
541 the correct orientation with mapping quality at least 20, the read depth filter was 10 for all samples,  
542 all heterozygous calls were removed and the mask file was generated manually by examining dot  
543 plots and removing regions with a high density of heterozygotes.

544 Synteny between the *D. medinensis* v3.0 assembly and the published *O. volvulus* v4.0 assembly was  
545 confirmed using *promer* from the Mummer package (Kurtz et al., 2004) to identify regions of >50%  
546 identity between the two sequences over 250 codons. These results were then visualised using  
547 *Circos* v0.67pre5 (Krzywinski et al., 2009). The phylogenetic tree for *D. medinensis* samples was  
548 based on the proportion of alleles matching between each pair of samples at those sites for which  
549 both samples in a pair had a genotype call that passed the filter criteria. A phylogeny based on these  
550 distances was inferred by neighbour-joining using the program *Neighbour* from *Phylip* v3.6  
551 (Felsenstein, 2005). Principal components analysis was performed on a matrix of genotypes for sites  
552 with no missing data in R v3.3.0 (R Core Team, 2015) using the *prcomp* command. Population  
553 genetic summary statistics within and between populations were calculated for 10kb window of  
554 SNPs containing between 5 and 500 variants, using *ANGSD* v0.919-20-gb988fab (Korneliussen,  
555 Albrechtsen, & Nielsen, 2014). This software estimates neutrality tests (Korneliussen, Moltke,  
556 Albrechtsen, & Nielsen, 2013) or genetic differentiation between populations (Fumagalli et al., 2013)  
557 following a probabilistic framework that employs genotype likelihoods. It is intended to be more

558 robust to genotyping error than traditional calculations using the genotypes directly. Only sites with  
559 a minimal depth of 5 reads, a minimal base and mapping quality Phred score of 30 and a call rate of  
560 at least five individuals were used, and genotype likelihoods were estimated under the samtools (Li  
561 et al., 2009) framework ( $GL = 1$ ). In the absence of known ancestral states, folded site frequency  
562 spectra were generated to derive nucleotide diversity  $\pi$ , Watterson's  $\theta$  and Tajima's  $D$ .  $F_{ST}$  estimates  
563 were computed from maximum-likelihood joint site frequency spectra between pairs of populations  
564 derived using the reference genome as the ancestral state. Estimates were generated for 10-Kb  
565 sliding windows (with 1 Kb overlaps) containing between 5 and 500 variants. We report genome-  
566 wide averages across these windows, and confidence intervals for these statistics were calculated  
567 for 10kb from 100 bootstrap replicates, resampling from 10kb windows. Unless otherwise specified,  
568 plots were produced in R v3.3.0 with ggplot2 (Wickham, 2009).

569 Bayesian clustering was performed with Maverick v1.0 using thermodynamic integration to estimate  
570 the number of clusters ( $K$ ) best describing the data (Verity & Nichols, 2016). Maverick was run for 3  
571 independent runs of 1,000 burnin generations and then 10,000 generations for inference, and with  
572 each rung of the thermodynamic integration run for 1,000 burnin generations and 5,000 generations  
573 for inference, for the default 21 rungs. For comparison, Structure v2.3.4 was run (Pritchard,  
574 Stephens, & Donnelly, 2000), using the deltaK method to select a value of  $K$ . Input to both of these  
575 was a set of 19,983 SNP variants samples across the *D. medinensis* scaffolds at 5kb intervals.  
576 Structure was run using an admixture model, with a burn-in of 100,000 generations and using  
577 another 100,000 generations for inference.

578 Population history of *D. medinensis* was inferred using BPP v4 [ref] to infer the number and  
579 branching pattern of populations, and then GPhoCS v1.2.2 (Gronau, Hubisz, Gulko, Danko, & Siepel,  
580 2011) to infer branching times and effective population sizes on the maximum posterior probability  
581 history. GPhoCS requires populations and the phylogeny to be specified a-priori, but is able to  
582 perform inference using a larger set of loci more efficiently. For GPhoCS a total of 781 loci were  
583 chosen as contiguous 1kb regions spaced every 100kb across all autosomal scaffolds. Results were  
584 scaled to time and effective population time using a mutation rate of  $2.7 \times 10^{-9}$  per generation, as  
585 estimated for *Caenorhabditis elegans* (Denver et al., 2009) and a generation time of 12 months: *D.*  
586 *medinensis* females emerge 10-14 months after infection (Muller, 1979). At least three (3-6)  
587 independent MCMC chains were run for each of 5 different prior assumptions, with each chain  
588 running for at least 25,000 MCMC generations. In each case, identical priors were used for all  $\theta$  and  $\tau$   
589 (population sizes and divergence times, respectively) parameters; priors for GPhoCS are specified as  
590 gamma distributions parameterised with a shape ( $\alpha$ ) and rate ( $\beta$ ) parameters (hyperparameters).

591 We held the  $\beta$  hyperparameter constant at 0.1, and chose  $\alpha$  values varying by 4 orders of  
592 magnitude, from  $10^{-4}$  to  $10^{-8}$ , so that the means of the prior distributions varied from 6.43335-64,335  
593 for  $\theta$ s following scaling and from 25.7342 to 257,342 for  $\tau$  parameters. The variance of the prior  
594 distributions also varied linearly with changes in the  $\alpha$  hyperparameter. Convergence was confirmed  
595 by visual inspection of the chains for each prior. For inference, the first 15,000 generations of each  
596 chain were removed and the remaining steps concatenated; highest posterior density estimates and  
597 effective sample sizes were calculated using the R packages HDInterval and mcmcse respectively. For  
598 all parameters the effective sample size was at least 250.

599 BPP attempts to identify reproductively isolated populations and estimate the phylogeny underlying  
600 those populations in a joint Bayesian framework (Yang & Rannala, 2010; Rannala & Yang, 2017).  
601 Population size parameters were assigned the default inverse gamma priors with mean 0.002 and  
602 shape parameter ( $\alpha$ )=3, the root divergence time an inverse gamma prior with mean 0.001 and  
603  $\alpha$  3, other divergence time parameters default Dirichlet prior. Each analysis is run at least twice  
604 to confirm consistency between runs, and each chain was run for 10,000 burnin generations and  
605 50,000 generations for inference. Convergence was assessed by inspection of these chains in Tracer  
606 v.1.6. For BPP, a subset of 100 loci was chosen at random from these 781 loci. Three different  
607 random sets of loci gave essentially identical results (97.2%, 98.2% and 98.4% support for the same  
608 maximum-probability reconstruction; duplicate runs of the same loci varied by less than 0.5%).

609 Kinship between samples was calculated using King v1.4 (Manichaikul et al., 2010). Distances  
610 between latitude and longitude points were calculated using the online calculator at the US National  
611 Oceanic and Atmospheric Administration at <https://www.nhc.noaa.gov/gccalc.shtml>.

612

613 **Declarations**

614 **Ethics approval and consent to participate:** Specific ethical approval was not required as material  
615 was derived from standard containment and treatment procedures sanctioned by WHO and national  
616 governments and performed by national control program staff, and molecular testing is part of the  
617 standard case confirmation procedure. Human case samples were anonymized prior to inclusion in  
618 this study.

619 **Consent for publication:** Not applicable

620 **Availability of data and materials:** All data generated in this study are available from the European  
621 Nucleotide Archive short read archive, a project ERP117282; accession numbers for individual  
622 samples are shown in supplementary table 1.

623 **Competing interests:** The authors declare that they have no competing interests

624

625 **Funding:** This work was supported by the Carter Center, Wellcome via core support of the Wellcome  
626 Sanger Institute (grants 098051 and 206194) and by BBSRC grant [BB/M003949/1](#).

627 **Authors' contributions:** CD, EAT, SRD, GS, AT and JAC analysed data. GS, ML, HMB, TH and ZA  
628 performed molecular biology. OT, MW, MSYL, COC, AW, AIS-H, JF, CAC, MJY, ER-T and MLE provided  
629 material. NH co-ordinated the generation of sequence data. ER-T, MB, MLE and JAC designed the  
630 study. JAC wrote the manuscript draft with contributions from CD and EAT. NH, GS, SRD, CAC, MJY,  
631 ER-T, MB and MLE also reviewed and edited the manuscript. All authors read and approved the final  
632 manuscript.

633 **Acknowledgements:** We thank the national Guinea worm eradication programs for collecting and  
634 making worm specimens and associated data available and the support of the Guinea worm  
635 program teams from the Carter Center and Centers for Disease Control and Eradication.

636

637

638 **References**

- 639 Al-Awadi, A. R., Al-Kuhlani, A., Breman, J. G., Doumbo, O., Eberhard, M. L., Guiguemde, R. T.,  
640 . . . Nadim, A. (2014). Guinea worm (Dracunculiasis) eradication: update on progress  
641 and endgame challenges. *Trans R Soc Trop Med Hyg*, 108(5), 249-251.  
642 doi:10.1093/trstmh/tru039
- 643 Bimi, L., Freeman, A. R., Eberhard, M. L., Ruiz-Tiben, E., & Pieniazek, N. J. (2005).  
644 Differentiating *Dracunculus medinensis* from *D. insignis*, by the sequence analysis of  
645 the 18S rRNA gene. *Ann Trop Med Parasitol*, 99(5), 511-517.  
646 doi:10.1179/136485905X51355
- 647 Biswas, G., Sankara, D. P., Agua-Agum, J., & Maiga, A. (2013). Dracunculiasis (guinea worm  
648 disease): eradication without a drug or a vaccine. *Philos Trans R Soc Lond B Biol Sci*,  
649 368(1623), 20120146. doi:10.1098/rstb.2012.0146
- 650 Bonfield, J. K., & Whitwham, A. (2010). Gap5--editing the billion fragment sequence  
651 assembly. *Bioinformatics*, 26(14), 1699-1703. doi:10.1093/bioinformatics/btq268
- 652 Bourne, P. G. (1982). Global eradication of guinea worm. *J R Soc Med*, 75(1), 1-3.
- 653 Cairncross, S., Muller, R., & Zagaria, N. (2002). Dracunculiasis (Guinea worm disease) and  
654 the eradication initiative. *Clin Microbiol Rev*, 15(2), 223-246.
- 655 Centers for Disease Control and Prevention. (2001). *Guinea worm wrap-up #110*. Atlanta,  
656 GA.
- 657 Centers for Disease Control and Prevention. (2018). *Guinea worm wrap-up #256*. Atlanta,  
658 GA.
- 659 Charlesworth, B., & Charlesworth, D. (2010). *Elements of evolutionary genetics*. Greenwood,  
660 CO: Roberts and Company.
- 661 Cleveland, C. A., Eberhard, M. L., Thompson, A. T., Smith, S. J., Zirimwabagabo, H., Bringolf,  
662 R., & Yabsley, M. J. (2017). Possible Role of Fish as Transport Hosts for *Dracunculus*  
663 spp. Larvae. *Emerg Infect Dis*, 23(9), 1590-1592. doi:10.3201/eid2309.161931
- 664 Cleveland, C. A., Garrett, K. B., Cozad, R. A., Williams, B. M., Murray, M. H., & Yabsley, M. J.  
665 (2018). The wild world of Guinea worms: A review of the genus *Dracunculus* in  
666 wildlife. *IJP: Parasites and Wildlife*, 7, 289-300.
- 667 Cole, R., & Viney, M. (2018). The population genetics of parasitic nematodes of wild animals.  
668 *Parasit Vectors*, 11(1), 590. doi:10.1186/s13071-018-3137-5
- 669 Cotton, J. A., Bennuru, S., Grote, A., Harsha, B., Tracey, A., Beech, R., . . . Lustigman, S.  
670 (2016). The genome of *Onchocerca volvulus*, agent of river blindness. *Nat Microbiol*,  
671 2, 16216. doi:10.1038/nmicrobiol.2016.216
- 672 Cotton, J. A., Berriman, M., Dalen, L., & Barnes, I. (2018). Eradication genomics-lessons for  
673 parasite control. *Science*, 361(6398), 130-131. doi:10.1126/science.aar6609
- 674 Denver, D. R., Dolan, P. C., Wilhelm, L. J., Sung, W., Lucas-Lledo, J. I., Howe, D. K., . . . Baer, C.  
675 F. (2009). A genome-wide view of *Caenorhabditis elegans* base-substitution  
676 mutation processes. *Proc Natl Acad Sci U S A*, 106(38), 16310-16314.  
677 doi:10.1073/pnas.0904895106
- 678 Derrien, T., Estelle, J., Marco Sola, S., Knowles, D. G., Raineri, E., Guigo, R., & Ribeca, P.  
679 (2012). Fast computation and applications of genome mappability. *PLoS One*, 7(1),  
680 e30377. doi:10.1371/journal.pone.0030377

- 681 Diez-Del-Molino, D., Sanchez-Barreiro, F., Barnes, I., Gilbert, M. T. P., & Dalen, L. (2018).  
682 Quantifying Temporal Genomic Erosion in Endangered Species. *Trends Ecol Evol*,  
683 33(3), 176-185. doi:10.1016/j.tree.2017.12.002
- 684 Doyle, S. R., Laing, R., Bartley, D. J., Britton, C., Chaudhry, U., Gilleard, J. S., . . . Sargison, N.  
685 D. (2018). A Genome Resequencing-Based Genetic Map Reveals the Recombination  
686 Landscape of an Outbred Parasitic Nematode in the Presence of Polyploidy and  
687 Polyandry. *Genome Biology and Evolution*, 10(2), 396-409.
- 688 Eberhard, M. L., Cleveland, C. A., Zirimwabagabo, H., Yabsley, M. J., Ouakou, P. T., & Ruiz-  
689 Tiben, E. (2016). Guinea Worm (*Dracunculus medinensis*) Infection in a Wild-Caught  
690 Frog, Chad. *Emerg Infect Dis*, 22(11), 1961-1962. doi:10.3201/eid2211.161332
- 691 Eberhard, M. L., Ruiz-Tiben, E., & Hopkins, D. R. (2016). Dogs and Guinea worm eradication.  
692 *Lancet Infect Dis*, 16(11), 1225-1226. doi:10.1016/S1473-3099(16)30380-2
- 693 Eberhard, M. L., Ruiz-Tiben, E., Hopkins, D. R., Farrell, C., Toe, F., Weiss, A., . . . Mounda, T.  
694 (2014). The peculiar epidemiology of dracunculiasis in Chad. *Am J Trop Med Hyg*,  
695 90(1), 61-70. doi:10.4269/ajtmh.13-0554
- 696 Eberhard, M. L., Yabsley, M. J., Zirimwabagabo, H., Bishop, H., Cleveland, C. A., Maerz, J. C., .  
697 . . Ruiz-Tiben, E. (2016). Possible Role of Fish and Frogs as Paratenic Hosts of  
698 *Dracunculus medinensis*, Chad. *Emerg Infect Dis*, 22(8), 1428-1430.  
699 doi:10.3201/eid2208.160043
- 700 Elsasser, S. C., Floyd, R., Hebert, P. D., & Schulte-Hostedde, A. I. (2009). Species  
701 identification of North American guinea worms (Nematoda: *Dracunculus*) with DNA  
702 barcoding. *Mol Ecol Resour*, 9(3), 707-712. doi:10.1111/j.1755-0998.2008.02393.x
- 703 Felsenstein, J. (2005). *PHYLIP (Phylogeny Inference Package) version 3.6*. Department of  
704 Genome Sciences, University of Washington, Seattle. Distributed by the author.
- 705 Fumagalli, M., Vieira, F. G., Korneliussen, T. S., Linderoth, T., Huerta-Sanchez, E.,  
706 Albrechtsen, A., & Nielsen, R. (2013). Quantifying population genetic differentiation  
707 from next-generation sequencing data. *Genetics*, 195(3), 979-992.  
708 doi:10.1534/genetics.113.154740
- 709 Grassly, N. C., & Orenstein, W. A. (2018). Securing the Eradication of All Polioviruses. *Clin*  
710 *Infect Dis*, 67(suppl\_1), S1-S3. doi:10.1093/cid/ciy651
- 711 Gronau, I., Hubisz, M. J., Gulko, B., Danko, C. G., & Siepel, A. (2011). Bayesian inference of  
712 ancient human demography from individual genome sequences. *Nat Genet*, 43(10),  
713 1031-1034. doi:10.1038/ng.937
- 714 Hoag, C., & Svenning, J. C. (2017). African Environmental Change from the Pleistocene to the  
715 Anthropocene. *Annual Review of Environment and Resources*, Vol 42, 42, 27-54.  
716 doi:10.1146/annurev-environ-102016-060653
- 717 Hopkins, D. R., & Ruiz-Tiben, E. (1991). Strategies for dracunculiasis eradication. *Bull World*  
718 *Health Organ*, 69(5), 533-540.
- 719 Hopkins, D. R., Ruiz-Tiben, E., Eberhard, M. L., Roy, S. L., & Weiss, A. J. (2017). Progress  
720 Toward Global Eradication of Dracunculiasis, January 2016-June 2017. *MMWR Morb*  
721 *Mortal Wkly Rep*, 66(48), 1327-1331. doi:10.15585/mmwr.mm6648a3
- 722 Hopkins, D. R., Ruiz-Tiben, E., Eberhard, M. L., Weiss, A., Withers, P. C., Roy, S. L., & Sienko,  
723 D. G. (2018). Dracunculiasis Eradication: Are We There Yet? *Am J Trop Med Hyg*,  
724 99(2), 388-395. doi:10.4269/ajtmh.18-0204
- 725 Hunt, M., Kikuchi, T., Sanders, M., Newbold, C., Berriman, M., & Otto, T. D. (2013). REAPR: a  
726 universal tool for genome assembly evaluation. *Genome Biol*, 14(5), R47.  
727 doi:10.1186/gb-2013-14-5-r47



- 728 International Helminth Genomes Consortium. (2017). *Comparative genomics of the major*  
729 *parasitic worms*. Retrieved from bioRxiv:
- 730 Jones, H. I., & Mulder, E. (2007). *Dracunculus mulbus* n. sp. (Nematoda: Spirurida) from the  
731 water python *Liasis fuscus* (Serpentes: Boidae) in northern Australia. *Syst Parasitol*,  
732 *66*(3), 195-205. doi:10.1007/s11230-006-9058-2
- 733 Klepac, P., Metcalf, C. J., McLean, A. R., & Hampson, K. (2013). Towards the endgame and  
734 beyond: complexities and challenges for the elimination of infectious diseases. *Philos*  
735 *Trans R Soc Lond B Biol Sci*, *368*(1623), 20120137. doi:10.1098/rstb.2012.0137
- 736 Korneliussen, T. S., Albrechtsen, A., & Nielsen, R. (2014). ANGSD: Analysis of Next  
737 Generation Sequencing Data. *BMC Bioinformatics*, *15*, 356. doi:10.1186/s12859-014-  
738 0356-4
- 739 Korneliussen, T. S., Moltke, I., Albrechtsen, A., & Nielsen, R. (2013). Calculation of Tajima's D  
740 and other neutrality test statistics from low depth next-generation sequencing data.  
741 *BMC Bioinformatics*, *14*, 289. doi:10.1186/1471-2105-14-289
- 742 Kozarewa, I., Ning, Z., Quail, M. A., Sanders, M. J., Berriman, M., & Turner, D. J. (2009).  
743 Amplification-free Illumina sequencing-library preparation facilitates improved  
744 mapping and assembly of (G+C)-biased genomes. *Nat Methods*, *6*(4), 291-295.  
745 doi:10.1038/nmeth.1311
- 746 Krzywinski, M., Schein, J., Birol, I., Connors, J., Gascoyne, R., Horsman, D., . . . Marra, M. A.  
747 (2009). Circos: an information aesthetic for comparative genomics. *Genome Res*,  
748 *19*(9), 1639-1645. doi:10.1101/gr.092759.109
- 749 Kurtz, S., Phillippy, A., Delcher, A. L., Smoot, M., Shumway, M., Antonescu, C., & Salzberg, S.  
750 L. (2004). Versatile and open software for comparing large genomes. *Genome Biol*,  
751 *5*(2), R12. doi:10.1186/gb-2004-5-2-r12
- 752 Li, H., Handsaker, B., Wysoker, A., Fennell, T., Ruan, J., Homer, N., . . . Genome Project Data  
753 Processing, S. (2009). The Sequence Alignment/Map format and SAMtools.  
754 *Bioinformatics*, *25*(16), 2078-2079. doi:10.1093/bioinformatics/btp352
- 755 Litvinov, S. K., & Lysenko, A. (1985). *Dracunculiasis: its history and eradication in the USSR*.  
756 In *Workshop on opportunities for control of Dracunculiasis*. Washington, D.C.:  
757 National Academy Press
- 758 Lynch, M. (2010). Evolution of the mutation rate. *Trends Genet*, *26*(8), 345-352.  
759 doi:10.1016/j.tig.2010.05.003
- 760 Manichaikul, A., Mychaleckyj, J. C., Rich, S. S., Daly, K., Sale, M., & Chen, W. M. (2010).  
761 Robust relationship inference in genome-wide association studies. *Bioinformatics*,  
762 *26*(22), 2867-2873. doi:10.1093/bioinformatics/btq559
- 763 Manning, K., & Timpson, A. (2014). The demographic response to Holocene climate change  
764 in the Sahara. *Quaternary Science Reviews*, *101*, 28-35.  
765 doi:10.1016/j.quascirev.2014.07.003
- 766 Mbong, E. N., Sume, G. E., Danbe, F., Kum, W. K., Mbi, V. O., Fouda, A. A., & Atem, P. (2015).  
767 Not every worm wrapped around a stick is a guinea worm: a case of *Onchocerca*  
768 *volvulus* mimicking *Dracunculus medinensis*. *Parasit Vectors*, *8*, 374.  
769 doi:10.1186/s13071-015-1004-1
- 770 Molyneux, D., & Sankara, D. P. (2017). Guinea worm eradication: Progress and challenges-  
771 should we beware of the dog? *PLoS Negl Trop Dis*, *11*(4), e0005495.  
772 doi:10.1371/journal.pntd.0005495
- 773 Muller, R. (1971). *Dracunculus* and dracunculiasis. *Adv Parasitol*, *9*, 73-151.

- 774 Muller, R. (1979). Guinea worm disease: epidemiology, control, and treatment. *Bull World*  
775 *Health Organ*, 57(5), 683-689.
- 776 Nadalin, F., Vezzi, F., & Policriti, A. (2012). GapFiller: a de novo assembly approach to fill the  
777 gap within paired reads. *BMC Bioinformatics*, 13 Suppl 14, S8. doi:10.1186/1471-  
778 2105-13-S14-S8
- 779 Nadler, S. A., Carreno, R. A., Mejia-Madrid, H., Ullberg, J., Pagan, C., Houston, R., & Hugot, J.  
780 P. (2007). Molecular phylogeny of clade III nematodes reveals multiple origins of  
781 tissue parasitism. *Parasitology*, 134(Pt 10), 1421-1442.  
782 doi:10.1017/S0031182007002880
- 783 Otto, T. D., Sanders, M., Berriman, M., & Newbold, C. (2010). Iterative Correction of  
784 Reference Nucleotides (iCORN) using second generation sequencing technology.  
785 *Bioinformatics*, 26(14), 1704-1707. doi:10.1093/bioinformatics/btq269
- 786 Post, R. (2005). The chromosomes of the Filariae. *Filaria Journal*, 4, 10.
- 787 Pritchard, J. K., Stephens, M., & Donnelly, P. (2000). Inference of population structure using  
788 multilocus genotype data. *Genetics*, 155(2), 945-959.
- 789 R Core Team. (2015). *R: a language and environment for statistical computing*. Vienna,  
790 Austria: R Foundation for Statistical Computing.
- 791 Rannala, B., & Yang, Z. (2017). Efficient Bayesian Species Tree Inference under the  
792 Multispecies Coalescent. *Syst Biol*, 66(5), 823-842. doi:10.1093/sysbio/syw119
- 793 Redman, E., Grillo, V., Saunders, G., Packard, E., Jackson, F., Berriman, M., & Gilleard, J. S.  
794 (2008). Genetics of mating and sex determination in the parasitic nematode  
795 *Haemonchus contortus*. *Genetics*, 180(4), 1877-1887.  
796 doi:10.1534/genetics.108.094623
- 797 Ruiz-Tiben, E., & Hopkins, D. R. (2006). Dracunculiasis (Guinea worm disease) eradication.  
798 *Adv Parasitol*, 61, 275-309. doi:10.1016/S0065-308X(05)61007-X
- 799 Stoll, N. R. (1947). This wormy world. *Journal of Parasitology*, 32, 1-18.
- 800 Tajima, F. (1989). The effect of change in population size on DNA polymorphism. *Genetics*,  
801 123(3), 597-601.
- 802 Thiele, E. A., Eberhard, M. L., Cotton, J. A., Durrant, C., Berg, J., Hamm, K., & Ruiz-Tiben, E.  
803 (2018). Population genetic analysis of Chadian Guinea worms reveals that human  
804 and non-human hosts share common parasite populations. *PLoS Negl Trop Dis*,  
805 12(10), e0006747.
- 806 Travassos, L. (1934). *Dracunculus fueelleborni* n. sp., parasito de *Didelphis aurita* Wied.  
807 *Memórias do Instituto Oswaldo Cruz*, 28(2), 235-237.
- 808 Tsai, I. J., Otto, T. D., & Berriman, M. (2010). Improving draft assemblies by iterative  
809 mapping and assembly of short reads to eliminate gaps. *Genome Biol*, 11(4), R41.  
810 doi:10.1186/gb-2010-11-4-r41
- 811 Verity, R., & Nichols, R. A. (2016). Estimating the Number of Subpopulations (K) in  
812 Structured Populations. *Genetics*, 203(4), 1827-1839.  
813 doi:10.1534/genetics.115.180992
- 814 Watts, S. J. (1987). Dracunculiasis in Africa in 1986: its geographic extent, incidence, and at-  
815 risk population. *Am J Trop Med Hyg*, 37(1), 119-125.
- 816 Weiss, A. J., Vestergaard Frandsen, T., Ruiz-Tiben, E., Hopkins, D. R., Aseidu-Bekoe, F., &  
817 Agyemang, D. (2018). What It Means to Be Guinea Worm Free: An Insider's Account  
818 from Ghana's Northern Region. *Am J Trop Med Hyg*, 98(5), 1413-1418.  
819 doi:10.4269/ajtmh.17-0558

- 820 Whitty, C. J. (2014). Milroy Lecture: eradication of disease: hype, hope and reality. *Clin Med*  
821 *(Lond)*, 14(4), 419-421. doi:10.7861/clinmedicine.14-4-419
- 822 Wickham, H. (2009). *ggplot2: elegant graphics for data analysis*. New York: Springer-Verlag.
- 823 Wijova, M., Moravec, F., Horak, A., Modry, D., & Lukes, J. (2005). Phylogenetic position of  
824 *Dracunculus medinensis* and some related nematodes inferred from 18S rRNA.  
825 *Parasitol Res*, 96(2), 133-135. doi:10.1007/s00436-005-1330-x
- 826 World Health Organisation. (1998). *Dracunculus eradication in Uzbekistan, report*  
827 *WHO/CDS/CEE/DRA/99.9* (W. H. Organisation Ed.). Geneva.
- 828 World Health Organisation. (2012). *Accelerating work to overcome the global impact of*  
829 *neglected tropical diseases—a roadmap for implementation*. Retrieved from Geneva,  
830 Switzerland:
- 831 Yang, Z., & Rannala, B. (2010). Bayesian species delimitation using multilocus sequence data.  
832 *Proc Natl Acad Sci U S A*, 107(20), 9264-9269. doi:10.1073/pnas.0913022107
- 833 Zhou, C., Yuan, K., Tang, X., Hu, N., & Peng, W. (2011). Molecular genetic evidence for  
834 polyandry in *Ascaris suum*. *Parasitol Res*, 108(3), 703-708. doi:10.1007/s00436-010-  
835 2116-3
- 836
- 837

838

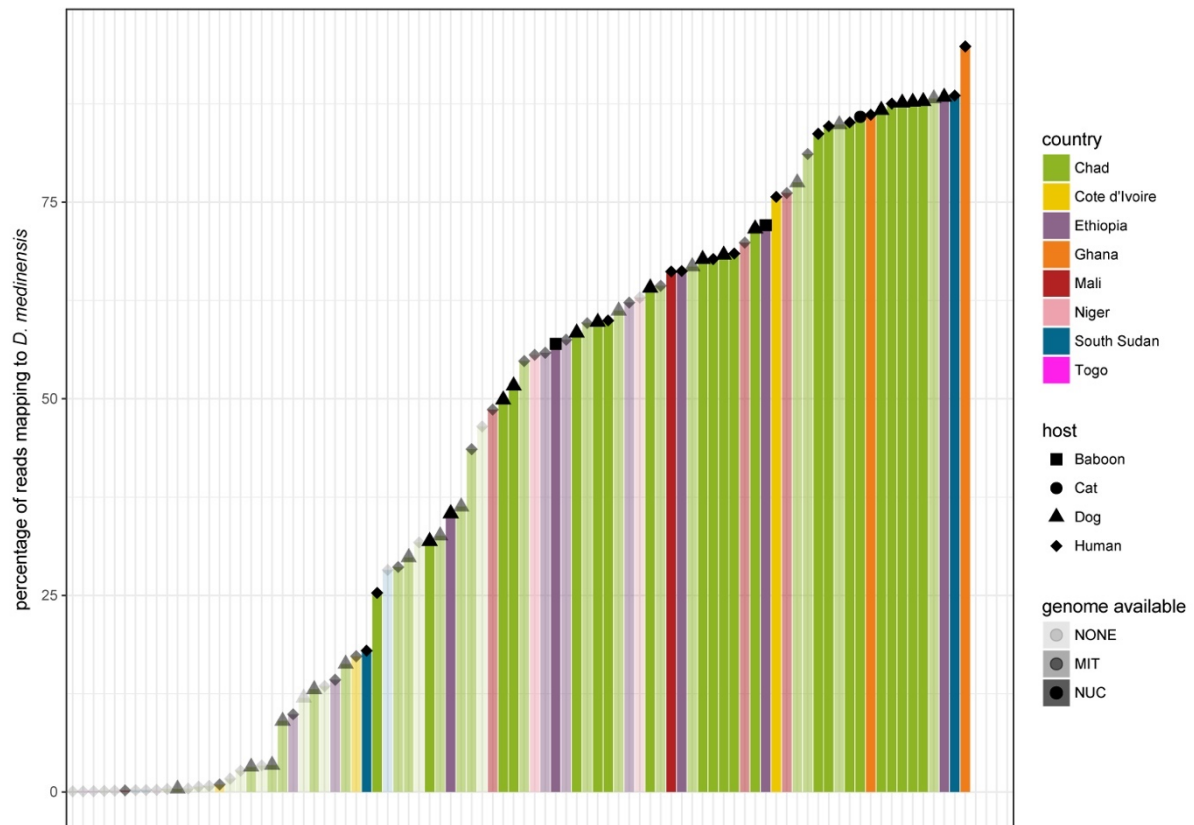

839

840 **Figure 1.** Proportion of sequencing reads mapping to the reference genome assembly for  
841 *Dracunculus medinensis* samples. Each bar indicates the proportion of sequencing reads from each  
842 sample that mapped against the reference genome assembly. The density of each bar indicates  
843 whether whole-genome data is included in our analysis, only mitochondrial genome data or whether  
844 insufficient data was available for that sample.

845

846

847

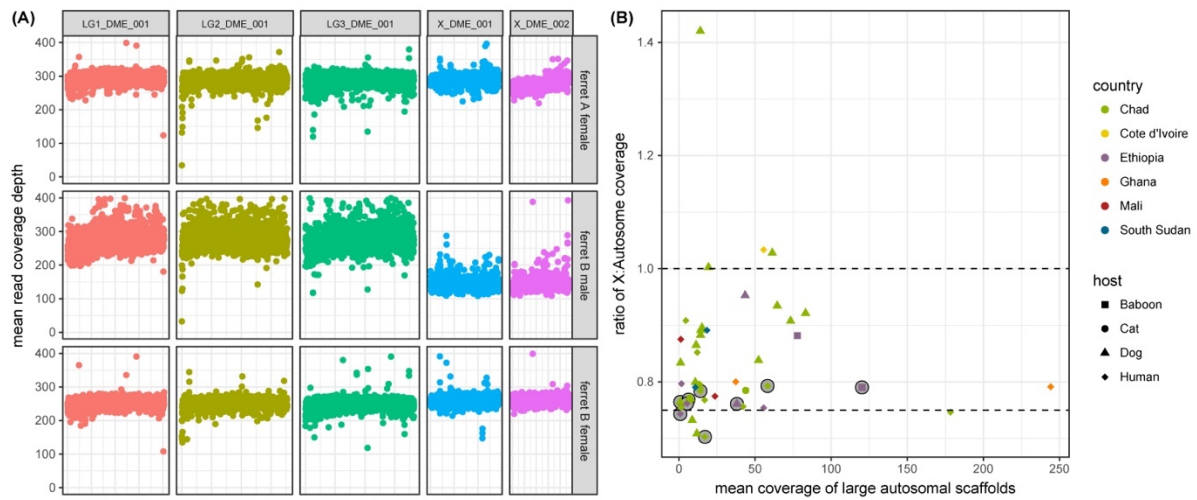

848

849 **Figure 2. (a)** Coverage variation across the *Dracunculus medinensis* genome in worms with known  
850 sex. Each point is the mean single read coverage across non-overlapping 5kb windows along the  
851 length of the five longest scaffolds for three juvenile worms recovered from an experimentally  
852 infected ferret. The 3 longest scaffolds show synteny to different *Onchocerca volvulus*  
853 chromosomes, the next 2 scaffolds are syntenic to the *O. volvulus* X chromosome (see  
854 Supplementary Figure S1). **(b)** Ratio of coverage across large autosomal and X-linked scaffolds for  
855 worm recovered from infected humans and animals in Africa. The y-axis shows the ratio of mean  
856 coverage on the 3 longest autosomal scaffolds to that of the mean coverage on the 2 longest X-  
857 linked scaffolds (these are the longest 5 scaffolds in the assembly, as shown in panel (a)).

858

859

860

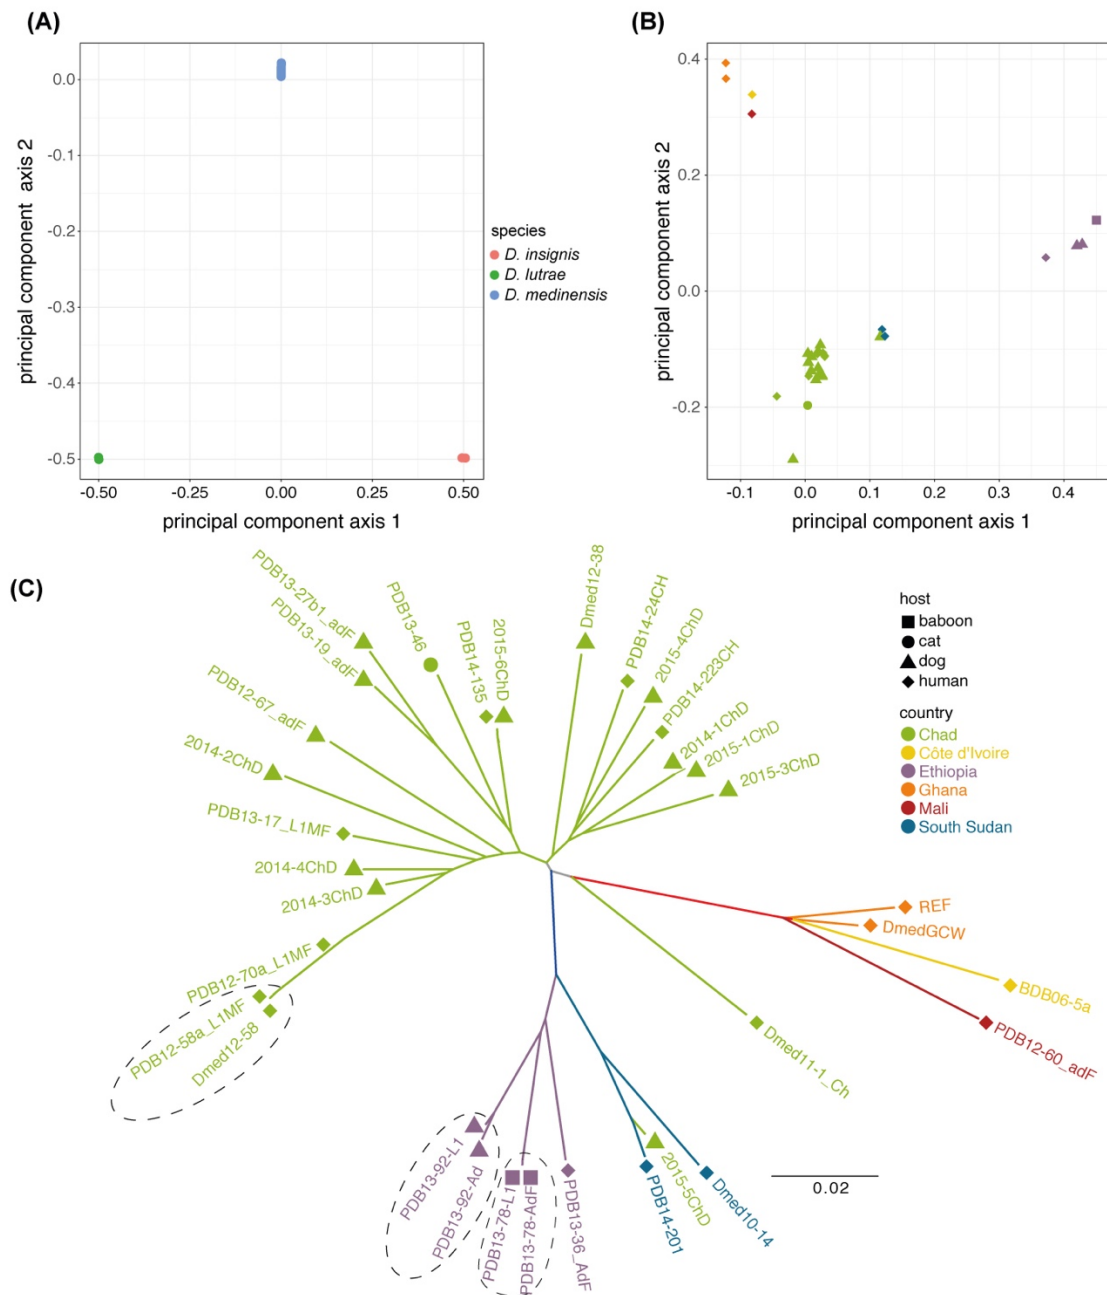

861

862 **Figure 3.** Principal components analysis of whole-genome data for **(a)** 33 *Dracunculus medinensis*  
 863 samples, 2 *D. insignis* samples and 1 *D. lutrae* sample and **(b)** principal components analysis and **(c)**  
 864 phylogenetic tree for just the 33 *D. medinensis* samples. The legend in the top right-hand corner of  
 865 (c) applies to both panels (b) and (c). Dotted lines on panel (c) indicate three pairs of samples where  
 866 both adult female tissue and L1 larvae from the same worm are included.

867

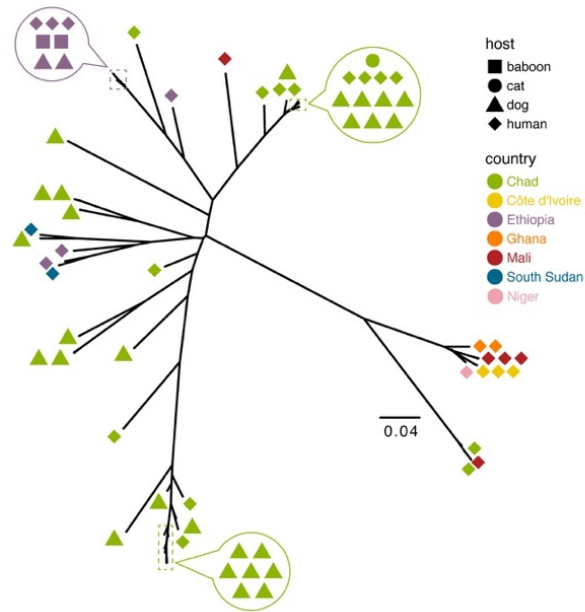

868

869 **Figure 4.** Phylogenetic tree based on inferred mitochondrial genome sequences for 65 *Dracunculus*  
870 *medinensis* samples for which sufficient coverage of the mitochondrial genome was available. For  
871 clarity, arrowed circles show host and geographic origin for samples with very similar mitochondrial  
872 haplotypes.

873

874

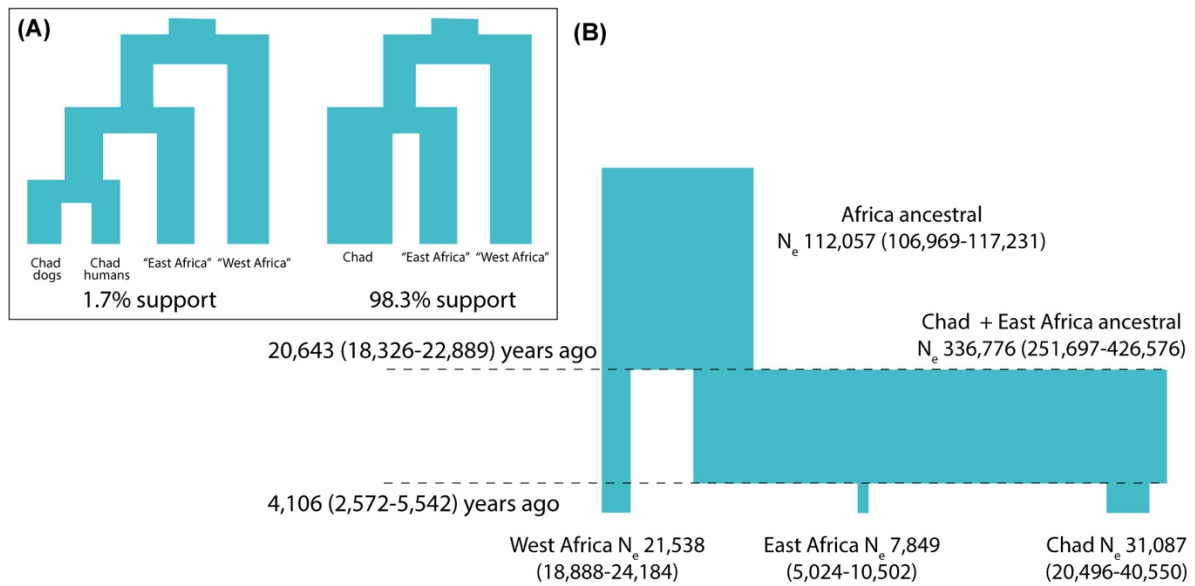

875

876 **Figure 5.** Coalescent models of *Dracunculus medinensis* population structure. (a) Out of all possible  
877 scenarios for up to 4 distinct isolated populations of *D. medinensis*, we find posterior support for  
878 only 2, with strong support only for a model in which all worms from Chad are part of one  
879 population, more closely related to worms from Ethiopia and South Sudan than to those from  
880 elsewhere in our sample set. (b) Estimates of divergence times and genetic (effective) population  
881 sizes under the supported model shown in (a). Values shown are posterior means and 95% highest  
882 posterior density estimates for each parameter in this model, under one set of prior assumptions.

883



884

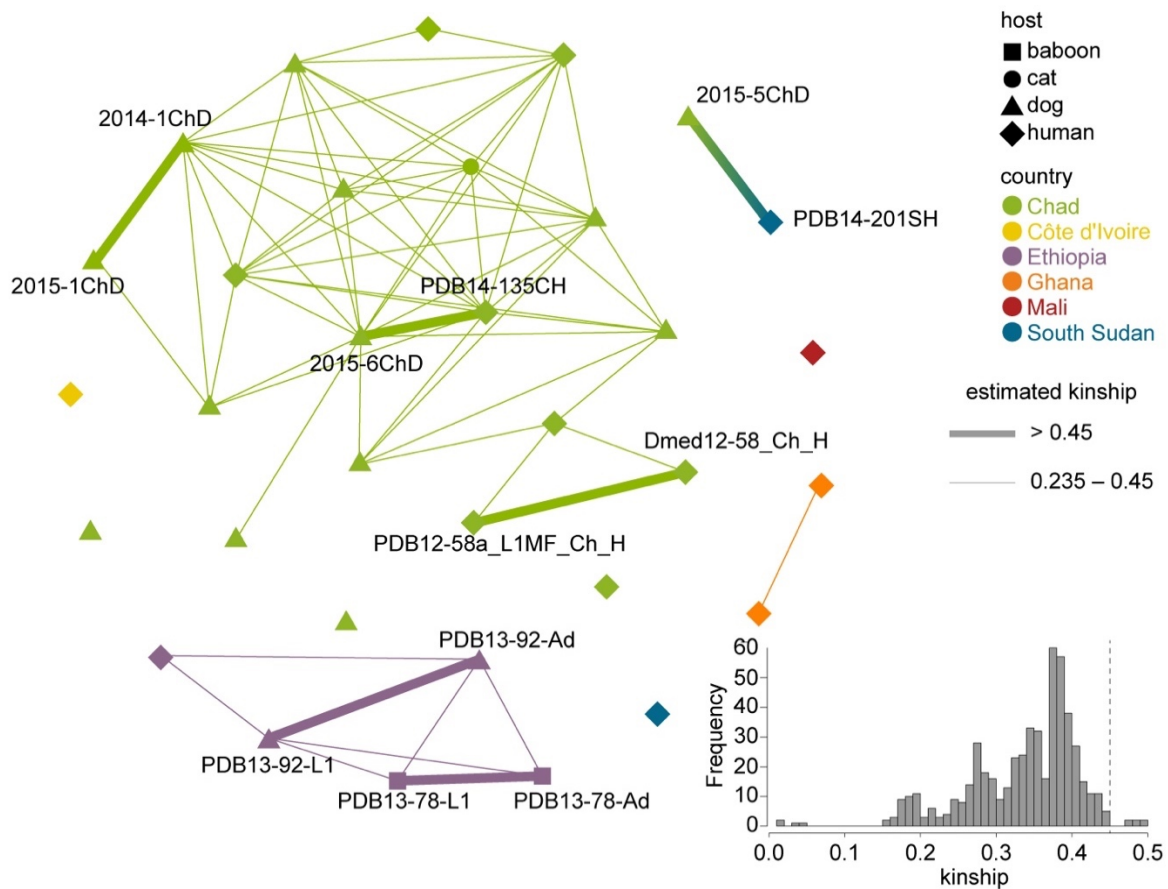

885

886 **Figure 6.** Relatedness between *Dracunculus medinensis* samples. Nodes on the graph represent  
887 worm samples, coloured by their country of origin, and node shapes indicate host species. Lines  
888 connect samples with high levels of identity by descent, indicative of direct relatedness. Thick lines  
889 indicate kinship > 0.45, whereas thinner lines indicate kinship between 0.45 and 0.235. For clarity,  
890 samples with other kinship coefficients are not connected in the graph, and sample names are  
891 shown only for those samples in high-relatedness pairs. Inset panel shows the distribution of kinship  
892 coefficients across all pairs of samples.

893

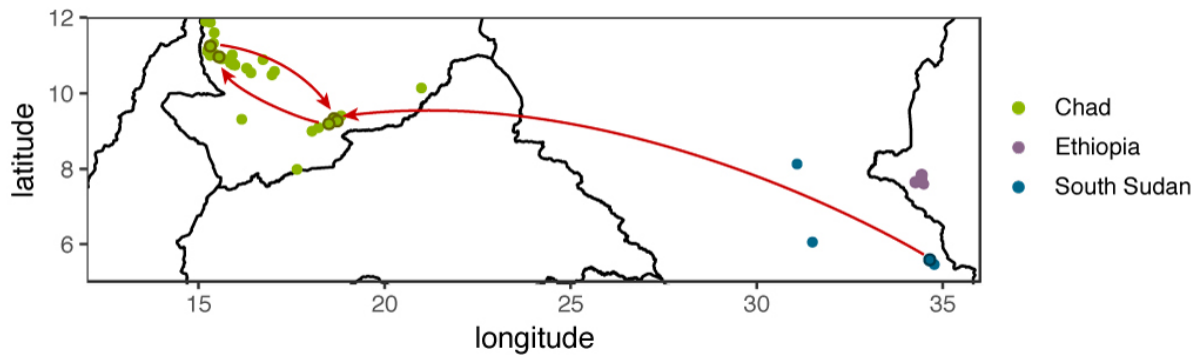

894  
895  
896  
897  
898  
899  
900  
901

**Figure 7** – Transmission events implied by three parent-offspring pairs inferred from high genome-wide identity by descent between worms isolated in consecutive years. Sample locations are indicated by dots, colour-coded by country of isolation. Red arrows indicate inferred parent-offspring relationships between samples; samples involved in these links are highlighted by dark rings around the point at which the infection was detected. The locations of detection may not represent the locations at which infections were acquired, or the location of residence of the hosts.

902

903

904 **Table 1** – Assembly statistics for *Dracunculus medinensis* assembly versions

|                                     | <b><i>D. medinensis</i> v2.0.4</b> | <b><i>D. medinensis</i> v3.0</b> |
|-------------------------------------|------------------------------------|----------------------------------|
| <b>Total length (bp)</b>            | 103,750,892                        | 103,601,578                      |
| <b>Number of scaffolds</b>          | 1350                               | 672                              |
| <b>Average scaffold length (bp)</b> | 76,853                             | 154,169                          |
| <b>N50 scaffold length (bp)</b>     | 665,026                            | 3,396,158                        |
| <b>Number of scaffolds &gt; N50</b> | 33                                 | 10                               |
| <b>N90 scaffold length (bp)</b>     | 74,011                             | 374,449                          |
| <b>Number of scaffolds &gt; N90</b> | 240                                | 42                               |
| <b>Total gap length (bp)</b>        | 167,953                            | 38,232                           |

905

906 **Table 2** – Population genetic summary statistics for *Dracunculus medinensis* populations. Values are  
907 means and 95% bootstrap confidence intervals for the means of 1kb windows containing between 5  
908 and 100 informative (variable) sites.

909

| population  | $\Pi$                         | Watterson's $\theta$           | Tajima's D                       |
|-------------|-------------------------------|--------------------------------|----------------------------------|
| Chad        | 0.0252<br>(0.0244- 0.0259)    | 0.0130<br>(0.0126,0.0135)      | 0.0637<br>(0.0617,0.0658)        |
| East Africa | 0.0217<br>(0.0209- 0.0225)    | 0.0154<br>(0.0148,0.0159)      | 0.0410<br>(0.0392,0.0429)        |
| West Africa | 0.00126<br>(0.000973-0.00162) | 0.00118<br>(0.000892,0.001508) | -0.00154<br>(-0.00308,-0.000139) |

910

911

912

913

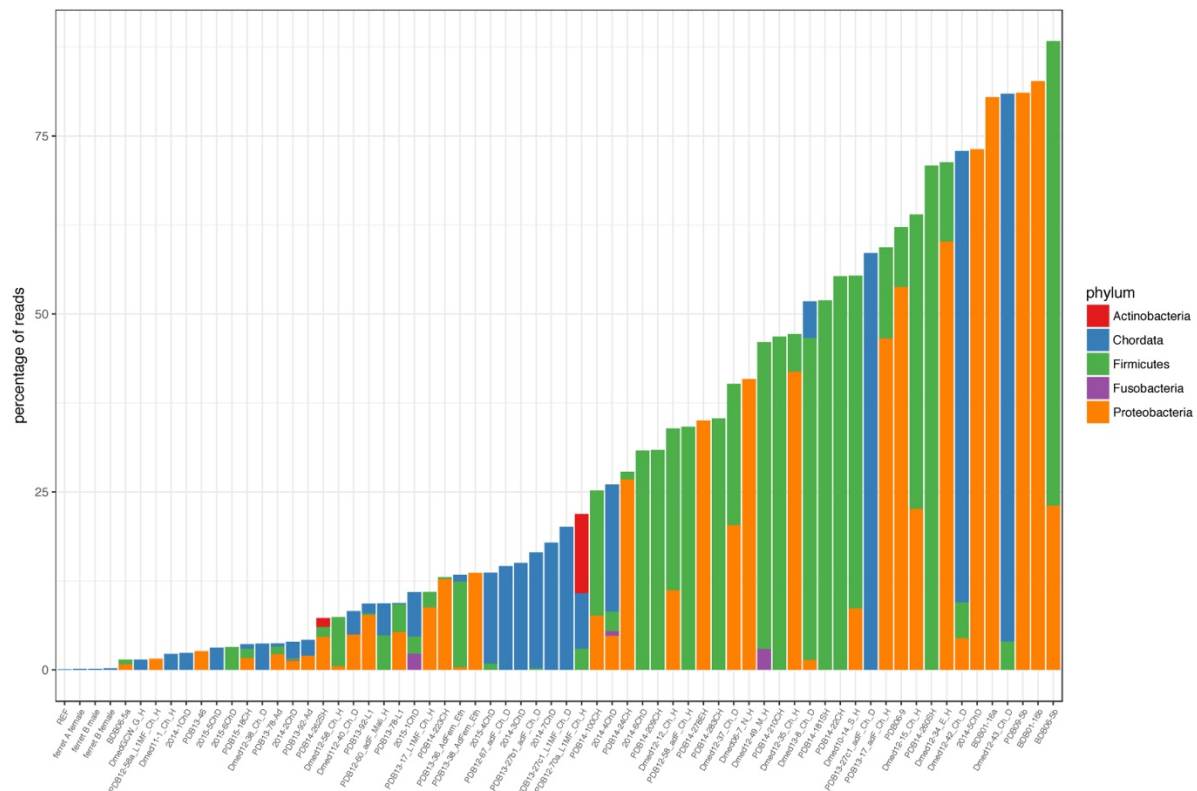

**Supplementary Figure 1** – Sources of contamination in sequencing libraries. Number of reads inferred by k-mer analysis to originate from different phyla. Data are shown for all phyla to which at least 50,000 reads were assigned. 68 samples are shown: those not shown here did not match any phyla with his cut-off. Note that no nematode sequences are in the database used for this search (see methods).

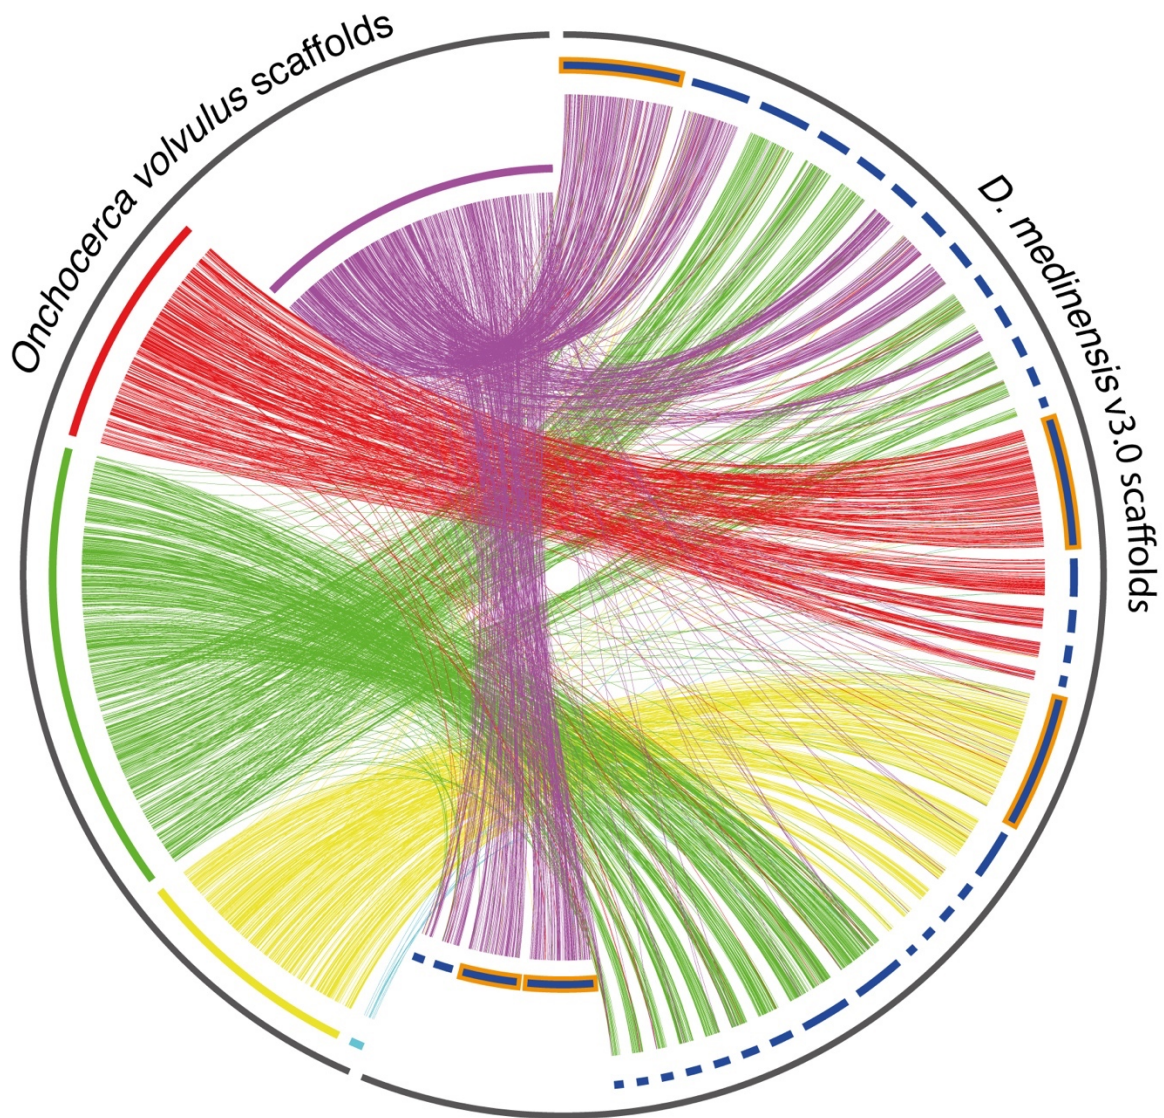

**Supplementary Figure 2** – Synteny between *D. medinensis* and *O. volvulus* scaffolds. Lines connect sequences for which the conceptual amino acid translations are at least 50% identical over 250 amino acids. *D. medinensis* scaffolds highlighted in orange are those shown in Figure 2a. Note that one of the longest scaffolds matches to the opposite end of the X-chromosome scaffold in *O. volvulus* to the scaffolds with reduced coverage in male worms. This region of *O. volvulus* X was not part of the ancestral filarial X chromosome (Cotton et al., 2016), and so is not expected to be part of *D. medinensis* X and is thus labelled as autosomal in Figure 2a, and considered as autosomal in our analyses here. *D. medinensis* scaffolds with reduced male coverage are shown inset.

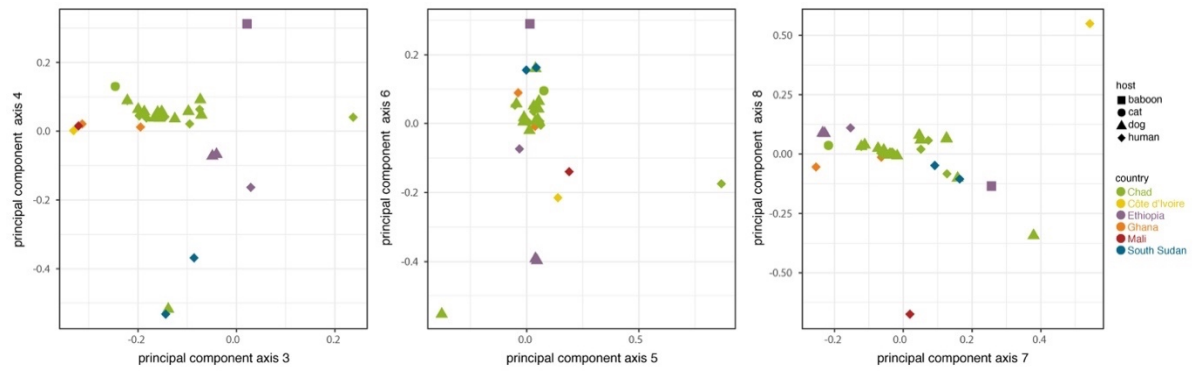

**Supplementary Figure 3** – PCA axes 3-8 for *Dracunculus medinensis* variation data; axes 1 and 2 are shown in main text Figure 3c.

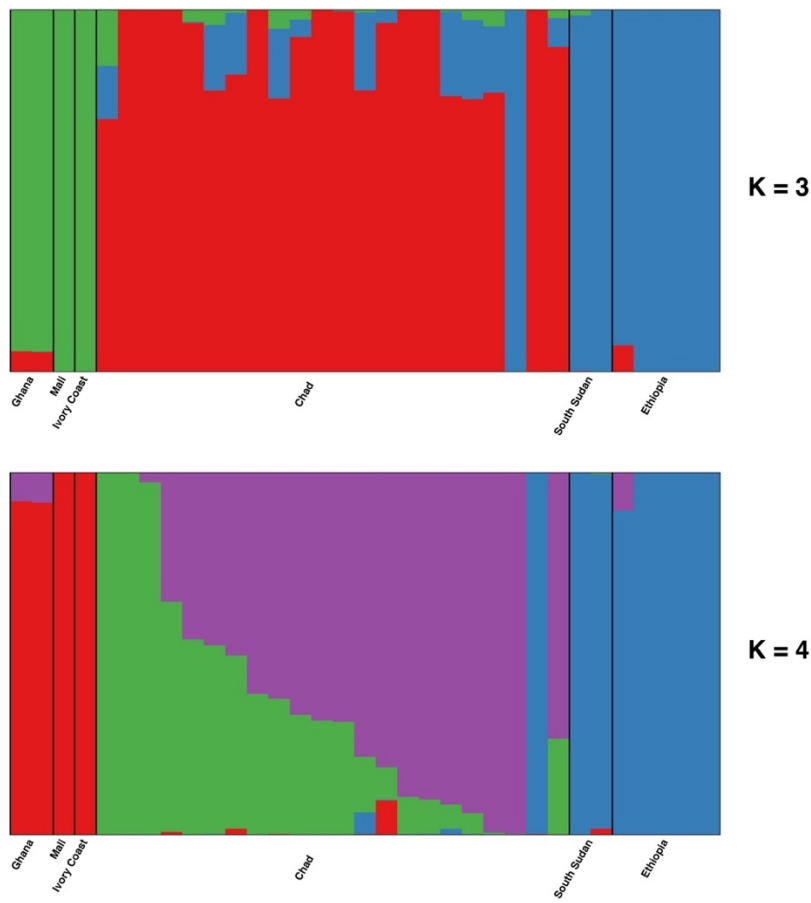

**Supplementary Figure 4** – Bayesian assignment of individual samples to populations, for  $k=3$  and  $k=4$  hypothetical populations. Vertical bars represent individuals, with the proportion of each color in each bar representing the proportion of inferred ancestry of that individual from the population. Note that the order of individual samples within each country differs between the two panels.



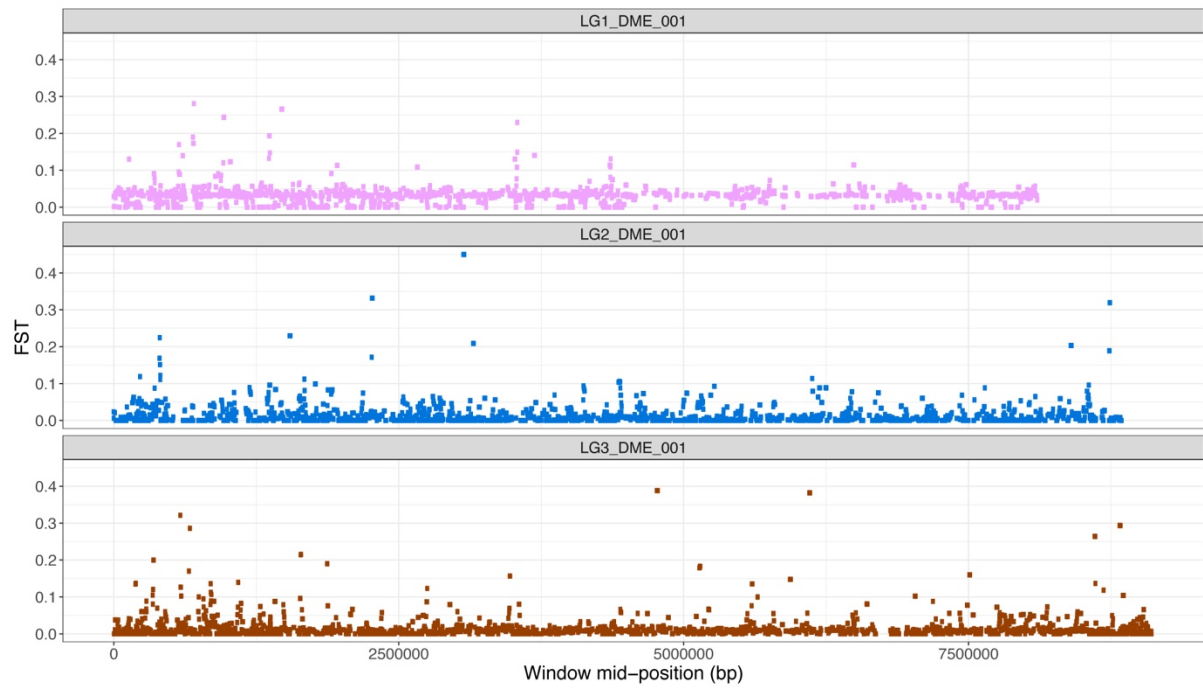

**Supplementary Figure 5** –  $F_{st}$  between *Dracunculus medinensis* samples from dogs and humans in Chad, across the three longest autosomal scaffolds. Values shown are mean  $F_{st}$  for non-overlapping 1kb windows centered at the position shown on the x axis.

**Supplementary Table 1** – Details of *Dracunculus medinensis* samples, sequencing data and sequencing libraries used in this study. Note that mean and median coverage are defined over the whole nuclear genome assembly for both MIT and NUC samples. Reads and mapping statistics are for the sum across all sequenced libraries and lanes. ENA= European Nucleotide Archive.

| sample name   | country       | host  | variant data    | total reads | reads mapping | percent mapping | mean coverage | median coverage | number of lanes | ENA accession numbers                   |
|---------------|---------------|-------|-----------------|-------------|---------------|-----------------|---------------|-----------------|-----------------|-----------------------------------------|
| PDB14-138CH   | Chad          | Human | no library made |             |               |                 |               |                 |                 |                                         |
| PDB14-23CH    | Chad          | Human | no library made |             |               |                 |               |                 |                 |                                         |
| PDB14-25CH    | Chad          | Human | no library made |             |               |                 |               |                 |                 |                                         |
| PDB14-287MH   | Mali          | Human | no library made |             |               |                 |               |                 |                 |                                         |
| BDB06-5b      | Cote d'Ivoire | Human | MIT             | 2,229,520   | 21,157        | 0.95            | 0.03          | 0               | 1               | ERR460382                               |
| PDB06-9       | Cote d'Ivoire | Human | MIT             | 2,115,778   | 365,211       | 17.26           | 0.53          | 0               | 1               | ERR460383                               |
| PDB14-181SH   | South Sudan   | Human | NONE            | 228,914     | 64,654        | 28.24           | 0.09          | 0               | 1               | ERR1081345                              |
| PDB14-260SH   | South Sudan   | Human | NONE            | 1,095,228   | 2,610         | 0.24            | 0.00          | 0               | 2               | ERR1081343                              |
| PDB14-262SH   | South Sudan   | Human | NONE            | 1,007,068   | 2,189         | 0.22            | 0.00          | 0               | 2               | ERR1081342,ERR1730377                   |
| PDB14-201SH   | South Sudan   | Human | NUC             | 11,201,696  | 9,920,172     | 88.56           | 12.05         | 10              | 2               | ERR1081344,ERR1243214                   |
| Dmed10-14_S_H | South Sudan   | Human | NUC             | 138,443,686 | 24,876,967    | 17.97           | 23.95         | 19              | 4               | ERR273907,ERR273929,ERR563493,ERR563499 |
| 2014-1ChD     | Chad          | Dog   | NUC             | 25,387,772  | 15,168,391    | 59.75           | 18.49         | 14              | 2               | ERR1081328,ERR1243211                   |
| 2014-2ChD     | Chad          | Dog   | NUC             | 118,848,030 | 59,278,247    | 49.88           | 71.60         | 61              | 2               | ERR1081357,ERR1243221                   |
| 2014-3ChD     | Chad          | Dog   | NUC             | 20,821,588  | 13,348,157    | 64.11           | 16.12         | 14              | 2               | ERR1081358,ERR1243222                   |
| 2014-4ChD     | Chad          | Dog   | NUC             | 34,795,436  | 17,975,620    | 51.66           | 21.76         | 19              | 2               | ERR1081359,ERR1243223                   |
| 2014-5ChD     | Chad          | Dog   | MIT             | 429,444     | 55,993        | 13.04           | 0.08          | 0               | 1               | ERR1081346                              |
| 2014-6ChD     | Chad          | Dog   | MIT             | 680,944     | 203,121       | 29.83           | 0.29          | 0               | 1               | ERR1081347                              |
| 2014-7ChD     | Chad          | Dog   | MIT             | 665,416     | 216,817       | 32.58           | 0.31          | 0               | 1               | ERR1081348                              |
| 2014-8ChD     | Chad          | Dog   | NONE            | 338,870     | 40,552        | 11.97           | 0.06          | 0               | 1               | ERR1081349                              |
| 2015-1ChD     | Chad          | Dog   | NUC             | 24,776,440  | 14,464,333    | 58.38           | 17.47         | 13              | 2               | ERR1081350,ERR1243215                   |
| 2015-2ChD     | Chad          | Dog   | MIT             | 8,900,594   | 7,848,792     | 88.18           | 9.51          | 8               | 2               | ERR1081351,ERR1243216                   |

|                        |               |       |      |             |             |       |        |     |   |                                                                                 |
|------------------------|---------------|-------|------|-------------|-------------|-------|--------|-----|---|---------------------------------------------------------------------------------|
| <b>2015-3ChD</b>       | Chad          | Dog   | NUC  | 11,763,796  | 10,321,366  | 87.74 | 12.54  | 11  | 2 | ERR1081352,ERR1243217                                                           |
| <b>2015-4ChD</b>       | Chad          | Dog   | NUC  | 33,738,410  | 10,758,127  | 31.89 | 13.03  | 11  | 2 | ERR1081326,ERR1243209                                                           |
| <b>2015-5ChD</b>       | Chad          | Dog   | NUC  | 11,309,548  | 9,933,132   | 87.83 | 12.06  | 10  | 2 | ERR1081327,ERR1243210                                                           |
| <b>2015-6ChD</b>       | Chad          | Dog   | NUC  | 17,397,832  | 11,787,265  | 67.75 | 14.24  | 13  | 2 | ERR1081353,ERR1243218                                                           |
| <b>2015-7ChD</b>       | Chad          | Dog   | MIT  | 324,328     | 198,454     | 61.19 | 0.29   | 0   | 1 | ERR1081354                                                                      |
| <b>2015-8ChD</b>       | Chad          | Dog   | MIT  | 8,057,292   | 6,838,667   | 84.88 | 8.27   | 7   | 2 | ERR1081355,ERR1243219                                                           |
| <b>BDB06-5a</b>        | Cote d'Ivoire | Human | NUC  | 89,024,662  | 67,376,292  | 75.68 | 65.70  | 55  | 5 | ERR460381,ERR563547,ERR563553,ERR563559,ERR563564                               |
| <b>BDB01-16a</b>       | Togo          | Human | NONE | 1,800,622   | 1,522       | 0.08  | 0.00   | 0   | 1 | ERR460379                                                                       |
| <b>BDB01-16b</b>       | Togo          | Human | NONE | 1,798,440   | 1,682       | 0.09  | 0.00   | 0   | 1 | ERR460380                                                                       |
| <b>Dmed06-7_N_H</b>    | Niger         | Human | NONE | 9,731,926   | 25,777      | 0.26  | 0.02   | 0   | 2 | ERR273906,ERR273928                                                             |
| <b>Dmed11-1_Ch_H</b>   | Chad          | Human | NUC  | 60,468,586  | 50,606,117  | 83.69 | 48.74  | 39  | 6 | ERR273901,ERR273923,ERR563491,ERR563497,ERR563525,ERR563536                     |
| <b>Dmed112-40_Ch_D</b> | Chad          | Dog   | MIT  | 16,826,492  | 535,336     | 3.18  | 0.52   | 0   | 2 | ERR273914,ERR273936                                                             |
| <b>Dmed12-12_Ch_H</b>  | Chad          | Human | NONE | 4,146,036   | 15,934      | 0.38  | 0.02   | 0   | 2 | ERR273902,ERR273924                                                             |
| <b>Dmed12-15_Ch_H</b>  | Chad          | Human | NONE | 4,465,058   | 3,230       | 0.07  | 0.00   | 0   | 2 | ERR273903,ERR273925                                                             |
| <b>Dmed12-34_E_H</b>   | Ethiopia      | Human | MIT  | 12,117,156  | 1,727,610   | 14.26 | 1.66   | 1   | 2 | ERR273908,ERR273930                                                             |
| <b>Dmed12-35_Ch_H</b>  | Chad          | Human | NONE | 11,603,600  | 313,203     | 2.7   | 0.30   | 0   | 2 | ERR273904,ERR273926                                                             |
| <b>Dmed12-37_Ch_D</b>  | Chad          | Dog   | MIT  | 14,276,312  | 55,830      | 0.39  | 0.05   | 0   | 4 | ERR273912,ERR273934,ERR319496,ERR319497                                         |
| <b>Dmed12-38_Ch_D</b>  | Chad          | Dog   | NUC  | 69,686,582  | 61,063,480  | 87.63 | 58.83  | 52  | 6 | ERR273913,ERR273935,ERR563495,ERR563501,ERR563529,ERR563540                     |
| <b>Dmed12-42_Ch_D</b>  | Chad          | Dog   | MIT  | 15,437,512  | 527,224     | 3.42  | 0.51   | 0   | 2 | ERR273915,ERR273937                                                             |
| <b>Dmed12-43_Ch_D</b>  | Chad          | Dog   | MIT  | 15,124,806  | 1,363,831   | 9.02  | 1.31   | 0   | 2 | ERR273916,ERR273938                                                             |
| <b>Dmed12-49_M_H</b>   | Mali          | Human | MIT  | 11,720,346  | 21,964      | 0.19  | 0.02   | 0   | 2 | ERR273909,ERR273931                                                             |
| <b>Dmed12-58_Ch_H</b>  | Chad          | Human | NUC  | 255,743,466 | 216,521,130 | 84.66 | 208.59 | 180 | 8 | ERR273905,ERR273927,ERR563492,ERR563498,ERR563526,ERR563537,ERR563560,ERR563565 |
| <b>Dmed12-60_M_H</b>   | Mali          | Human | MIT  | 1,886,708   | 1,437,002   | 76.16 | 1.38   | 1   | 2 | ERR273910,ERR273932                                                             |
| <b>Dmed13-8_Ch_D</b>   | Chad          | Dog   | MIT  | 193,521,152 | 31,504,467  | 16.28 | 30.60  | 10  | 3 | ERR349721,ERR563503,ERR563514                                                   |
| <b>DmedGCW_G_H</b>     | Ghana         | Human | NUC  | 51,467,850  | 44,327,136  | 86.13 | 42.71  | 37  | 6 | ERR273911,ERR273933,ERR563494,ERR563500,ERR563528,ERR563539                     |
| <b>PDB09-5a</b>        | Niger         | Human | MIT  | 952,294     | 529,410     | 55.59 | 0.76   | 0   | 1 | ERR460384                                                                       |
| <b>PDB09-5b</b>        | Niger         | Human | NONE | 1,654,502   | 2,611       | 0.16  | 0.00   | 0   | 1 | ERR460385                                                                       |

|                      |          |        |      |             |             |       |        |     |   |                                                   |
|----------------------|----------|--------|------|-------------|-------------|-------|--------|-----|---|---------------------------------------------------|
| PDB12-58_adF_Ch_H    | Chad     | Human  | MIT  | 1,855,966   | 1,017,293   | 54.81 | 1.47   | 1   | 1 | ERR349722                                         |
| PDB12-58a_L1MF_Ch_H  | Chad     | Human  | NUC  | 78,014,152  | 66,426,989  | 85.15 | 64.98  | 58  | 5 | ERR349723,ERR563504,ERR563515,ERR563530,ERR563541 |
| PDB12-60_adF_Mali_H  | Mali     | Human  | NUC  | 43,539,932  | 28,816,385  | 66.18 | 27.92  | 23  | 5 | ERR349724,ERR563505,ERR563516,ERR563531,ERR563542 |
| PDB12-67_adF_Ch_D    | Chad     | Dog    | NUC  | 139,667,262 | 100,037,721 | 71.63 | 97.62  | 85  | 5 | ERR349729,ERR563508,ERR563519,ERR563532,ERR563543 |
| PDB12-67_L1MF_Ch_D   | Chad     | Dog    | MIT  | 819,306     | 634,946     | 77.5  | 0.92   | 1   | 1 | ERR349730                                         |
| PDB12-70a_L1MF_Ch_H  | Chad     | Human  | NUC  | 92,134,304  | 23,316,394  | 25.31 | 22.64  | 14  | 3 | ERR349726,ERR563506,ERR563517                     |
| PDB12-70b_adF_Ch_H   | Chad     | Human  | NONE | 402,610     | 187,091     | 46.47 | 0.27   | 0   | 1 | ERR349725                                         |
| PDB13-17_adF_Ch_H    | Chad     | Human  | MIT  | 1,510,120   | 432,055     | 28.61 | 0.62   | 0   | 1 | ERR349727                                         |
| PDB13-17_L1MF_Ch_H   | Chad     | Human  | NUC  | 23,046,238  | 15,617,912  | 67.77 | 15.47  | 13  | 3 | ERR349728,ERR563507,ERR563518                     |
| PDB13-19_adF_Ch_D    | Chad     | Dog    | NUC  | 88,741,138  | 76,943,100  | 86.71 | 75.18  | 65  | 5 | ERR349731,ERR563509,ERR563520,ERR563533,ERR563544 |
| PDB13-27b1_adF_Ch_D  | Chad     | Dog    | NUC  | 139,764,890 | 95,458,521  | 68.3  | 92.70  | 74  | 5 | ERR349732,ERR563510,ERR563521,ERR563534,ERR563545 |
| PDB13-27c1_adF_Ch_D  | Chad     | Dog    | MIT  | 2,157,112   | 782,842     | 36.29 | 1.13   | 1   | 1 | ERR349733                                         |
| PDB13-27c1_L1MF_Ch_D | Chad     | Dog    | MIT  | 15,484,644  | 10,348,781  | 66.83 | 10.26  | 8   | 3 | ERR349734,ERR563511,ERR563522                     |
| PDB13-36_AdFem_Eth   | Ethiopia | Human  | NUC  | 100,290,004 | 66,446,625  | 66.25 | 64.50  | 55  | 5 | ERR349735,ERR563512,ERR563523,ERR563535,ERR563546 |
| PDB13-36_L1mix_Eth   | Ethiopia | Human  | MIT  | 1,023,952   | 637,308     | 62.24 | 0.92   | 1   | 1 | ERR349736                                         |
| PDB13-38_AdFem_Eth   | Ethiopia | Human  | MIT  | 2,162,982   | 1,208,094   | 55.85 | 1.75   | 1   | 1 | ERR349737                                         |
| PDB13-38_L1mix_Eth   | Ethiopia | Human  | MIT  | 10,231,108  | 5,883,801   | 57.51 | 5.87   | 5   | 3 | ERR349738,ERR563513,ERR563524                     |
| PDB13-46             | Chad     | Cat    | NUC  | 59,685,340  | 51,250,126  | 85.87 | 50.15  | 43  | 5 | ERR460386,ERR563548,ERR563554,ERR563561,ERR563566 |
| PDB13-78-Ad          | Ethiopia | Baboon | NUC  | 131,493,342 | 94,794,894  | 72.09 | 92.26  | 77  | 3 | ERR460387,ERR563549,ERR563555                     |
| PDB13-78-L1          | Ethiopia | Baboon | NUC  | 245,165,212 | 139,723,590 | 56.99 | 135.99 | 121 | 3 | ERR460389,ERR563550,ERR563556                     |
| PDB13-92-Ad          | Ethiopia | Dog    | NUC  | 59,912,414  | 52,943,803  | 88.37 | 51.67  | 43  | 5 | ERR460388,ERR563527,ERR563538,ERR563562,ERR563567 |
| PDB13-92-L1          | Ethiopia | Dog    | NUC  | 122,349,456 | 43,334,484  | 35.42 | 42.10  | 37  | 5 | ERR460390,ERR563551,ERR563557,ERR563563,ERR563568 |
| PDB14-100CH          | Chad     | Human  | MIT  | 8,469,766   | 6,871,657   | 81.13 | 8.32   | 7   | 2 | ERR1081332,ERR1243213                             |
| PDB14-135CH          | Chad     | Human  | NUC  | 17,636,172  | 12,076,788  | 68.48 | 14.66  | 13  | 2 | ERR1081331,ERR1243212                             |
| PDB14-207CH          | Chad     | Human  | NONE | 219,034     | 1,666       | 0.76  | 0.00   | 0   | 2 | ERR1081362                                        |
| PDB14-209CH          | Chad     | Human  | NONE | 465,120     | 15,711      | 3.38  | 0.02   | 0   | 1 | ERR1081322                                        |

|                        |          |       |      |             |             |       |        |     |   |                       |
|------------------------|----------|-------|------|-------------|-------------|-------|--------|-----|---|-----------------------|
| <b>PDB14-210CH</b>     | Chad     | Human | NONE | 822,112     | 1,090       | 0.13  | 0.00   | 0   | 3 | ERR1081361            |
| <b>PDB14-22CH</b>      | Chad     | Human | NONE | 377,076     | 1,623       | 0.43  | 0.00   | 0   | 1 | ERR1081336            |
| <b>PDB14-223CH</b>     | Chad     | Human | NUC  | 12,766,930  | 11,176,393  | 87.54 | 13.55  | 11  | 2 | ERR1081325,ERR1243208 |
| <b>PDB14-24CH</b>      | Chad     | Human | NUC  | 26,045,970  | 15,618,401  | 59.96 | 18.88  | 16  | 2 | ERR1081319,ERR1243206 |
| <b>PDB14-240MH</b>     | Mali     | Human | MIT  | 374,388     | 261,532     | 69.86 | 0.38   | 0   | 1 | ERR1081341            |
| <b>PDB14-253MH</b>     | Mali     | Human | MIT  | 608,986     | 296,201     | 48.64 | 0.43   | 0   | 1 | ERR1081340            |
| <b>PDB14-269MH</b>     | Mali     | Human | NONE | 599,264     | 376,797     | 62.88 | 0.54   | 0   | 1 | ERR1081338            |
| <b>PDB14-278EH</b>     | Ethiopia | Human | MIT  | 834,286     | 82,418      | 9.88  | 0.12   | 0   | 1 | ERR1081337            |
| <b>PDB14-279CH</b>     | Chad     | Human | NONE | 1,091,738   | 7,128       | 0.65  | 0.01   | 0   | 1 | ERR1081324            |
| <b>PDB14-283CH</b>     | Chad     | Human | MIT  | 778,050     | 339,157     | 43.59 | 0.49   | 0   | 1 | ERR1081323            |
| <b>PDB14-68CH</b>      | Chad     | Human | MIT  | 286,718     | 184,537     | 64.36 | 0.27   | 0   | 1 | ERR1081333            |
| <b>PDB14-69CH</b>      | Chad     | Human | NONE | 987,276     | 132,848     | 13.46 | 0.19   | 0   | 1 | ERR1081364            |
| <b>PDB15-18CH</b>      | Chad     | Human | MIT  | 17,468,312  | 10,416,113  | 59.63 | 12.57  | 10  | 2 | ERR1081360,ERR1243224 |
| <b>PDB15-24CH</b>      | Chad     | Human | NONE | 306,614     | 97,299      | 31.73 | 0.14   | 0   | 1 | ERR1081330            |
| <b>PDB15-46CH</b>      | Chad     | Human | NONE | 151,762     | 2,543       | 1.68  | 0.00   | 0   | 1 | ERR1081329            |
| <b>REF</b>             | Ghana    | Human | NUC  | 300,273,364 | 284,679,336 | 94.81 | 274.25 | 244 | 1 | ERR066175             |
| <b>ferret A female</b> | N/A*     | N/A   | N/A  | 323,962,030 | 91,896,737  | 90.1  | 424.30 | 391 | 1 | ERR1945309            |
| <b>ferret B male</b>   | N/A*     | N/A   | N/A  | 316,685,164 | 274,866,059 | 86.79 | 399.50 | 365 | 1 | ERR1945310            |
| <b>ferret B female</b> | N/A*     | N/A   | N/A  | 293,016,784 | 261,298,996 | 89.18 | 379.81 | 346 | 1 | ERR1945311            |

\*parasites originated from an infected dog from Chad

**Supplementary Table 2** – Details of *Dracunculus insignis* and *D. lutrae* samples, sequencing data and libraries used in this study. Reads and mapping statistics are for the sum across all sequenced libraries and lanes. ENA = European Nucleotide Archive.

| sample name       | country | host | species  | total reads | reads mapping | percent mapping | mean coverage | median coverage | number of lanes | ENA accession numbers                      |
|-------------------|---------|------|----------|-------------|---------------|-----------------|---------------|-----------------|-----------------|--------------------------------------------|
| <b>Din88-31</b>   | USA     |      | insignis | 251825454   | 56729856      | 22.5            | 33.37         | 12              | 4               | ERR273919, ERR273941, ERR563496, ERR563502 |
| <b>Din88-31L1</b> | USA     |      | insignis | 147069250   | 32767530      | 22.3            | 21.43         | 8               | 4               | ERR273922, ERR273944, ERR563552, ERR563558 |
| <b>Dlut</b>       | Canada  |      | lutrae   | 87800942    | 2292804       | 2.6             | 2.14          | 1               | 2               | ERR1081356, ERR1243220                     |

**Supplementary Table 3** – influence of different prior distribution assumptions on results of coalescence analysis. Values are means of the posterior distribution and 95% highest posterior density confidence intervals.  $\Theta$  values are effective population size estimates and  $\tau$  are divergence time estimates. East+Chad and Africa representing the two ancestral populations, as shown on Figure 5.

| prior            | $\Theta_{W. AFRICA}$      | $\Theta_{CHAD}$           | $\Theta_{E. AFRICA}$  | $\Theta_{EAST+CHAD}$       | $\Theta_{AFRICA}$          | $\tau_{EAST+CHAD}$   | $\tau_{AFRICA}$         |
|------------------|---------------------------|---------------------------|-----------------------|----------------------------|----------------------------|----------------------|-------------------------|
| $\alpha=10^{-8}$ | 21,538<br>(18,888-24,184) | 31,087<br>(20,496-40,550) | 7,849<br>(5024-10502) | 336,776<br>(251697-426576) | 112,057<br>(106969-117231) | 4,106<br>(2572-5542) | 20,643<br>(18326-22889) |
| $\alpha=10^{-7}$ | 21,625<br>(19160-24188)   | 28,361<br>(18744-36941)   | 7,151<br>(4756-9323)  | 349,031<br>(252008-463045) | 112,494<br>(107749-117749) | 3,729<br>(2347-4809) | 20,760<br>(18660-22996) |
| $\alpha=10^{-6}$ | 21,147<br>(18633-23594)   | 28,192<br>(18103-36990)   | 7,370<br>(4603-9464)  | 394,842<br>(273224-504162) | 112,903<br>(108006-118058) | 3,841<br>(2358-5080) | 20,398<br>(18047-22869) |
| $\alpha=10^{-5}$ | 21,563<br>(18831-24496)   | 29,894<br>(20177-39670)   | 7,617<br>(4998-10102) | 350,866<br>(253046-471265) | 112,844<br>(107483-118213) | 4,014<br>(2572-5421) | 20,612<br>(18150-23222) |
| $\alpha=10^{-4}$ | 21,233<br>(18420-23886)   | 32,283<br>(22994-41750)   | 8,153<br>(5596-10490) | 340,002<br>(244403-437895) | 112,930<br>(107743-118174) | 4,305<br>(2895-5559) | 20,319<br>(17666-22705) |
